# Supplementary material
Source: PubMed Central journal article supplement (PMC3089805)

## Supporting Information

### Synthesis and Antimicrobial Evaluation of Nitazoxanide-Based Analogues: Identification of Selective and Broad Spectrum Activity

T. Eric Ballard,<sup>a\*</sup> Xia Wang,<sup>b</sup> Igor Olekhovich,<sup>b</sup> Taylor Koerner,<sup>a</sup> Craig Seymour,<sup>a</sup>  
Joseph Salamoun,<sup>a</sup> Michelle Warthan,<sup>b</sup> Paul S. Hoffman,<sup>b,c</sup> Timothy L. Macdonald<sup>a</sup>

<sup>a</sup> Department of Chemistry, University of Virginia, Charlottesville, VA 22904-4319, USA;

<sup>b</sup> Department of Medicine, Division of Infectious Diseases and International Health and

<sup>c</sup> Department of Microbiology, University of Virginia School of Medicine, Charlottesville, VA 22908-0734,  
USA

\* Corresponding author: teb2m@virginia.edu

#### I. Full Activity Table for NTZ Analogues against *S. aureus* and *S. epidermidis*

| Analogues        | MIC's (µM)              |                       |
|------------------|-------------------------|-----------------------|
|                  | <i>S. aureus</i> (MRSA) | <i>S. epidermidis</i> |
| Nitazoxanide (1) | 39.1                    | 52.1                  |
| 6                | 18.7                    | 119.7                 |
| 7                | 16.8                    | 22.5                  |
| 8                | 8.4                     | 15.0                  |
| 9                | 28.0                    | 42.1                  |
| 10               | 10.5                    | 28.0                  |
| 11               | 28.0                    | 28.0                  |
| 12               | 39.6                    | 52.8                  |
| 13               | 29.7                    | 66.0                  |
| 14               | 33.0                    | 33.0                  |
| 15               | 6.2                     | 12.5                  |
| 16               | 8.8                     | 47.2                  |
| 17               | 3.9                     | 20.9                  |
| 18               | 7.8                     | 31.3                  |
| 19               | 2.0                     | 26.1                  |
| 20               | 43.8                    | 29.2                  |
| 21               | 14.6                    | 21.9                  |
| 22               | 25.2                    | 25.2                  |
| 23               | 3.2                     | 12.6                  |
| 24               | 100.9                   | 12.6                  |
| 25               | 108.8                   | 40.8                  |
| 26               | 10.2                    | 10.2                  |
| 27               | 20.4                    | 10.2                  |
| 28               | 114.6                   | 114.6                 |
| 29               | 14.3                    | 28.6                  |
| 30               | 28.6                    | 28.6                  |
| 31               | 6.0                     | 12.0                  |
| 32               | 92.1                    | 92.1                  |
| 33               | 98.7                    | 12.3                  |
| 34               | 103.1                   | 77.4                  |
| 35               | 8.9                     | 23.9                  |
| 36               | 88.3                    | 88.3                  |
| 37               | 76.9                    | 51.2                  |
| 38               | 2.6                     | 1.9                   |

|           |       |       |
|-----------|-------|-------|
| <b>39</b> | 22.7  | 22.7  |
| <b>40</b> | 11.4  | 11.4  |
| <b>41</b> | 2.8   | 2.8   |
| <b>42</b> | 12.0  | 32.1  |
| <b>43</b> | 121.5 | 22.8  |
| <b>44</b> | 115.4 | 14.4  |
| <b>45</b> | 109.8 | 109.8 |
| <b>46</b> | 13.8  | 13.8  |
| <b>47</b> | 106.2 | 106.2 |
| <b>48</b> | 171.0 | 21.4  |
| <b>49</b> | 148.7 | 37.2  |
| <b>50</b> | 131.5 | 32.9  |
| <b>51</b> | 59.0  | 11.1  |
| <b>52</b> | 106.9 | 106.9 |
| <b>53</b> | 125.2 | 31.3  |
| <b>54</b> | 116.2 | 29.1  |
| <b>55</b> | 93.2  | 2.9   |
| <b>56</b> | 127.9 | 127.9 |
| <b>57</b> | 119.3 | 119.3 |
| <b>58</b> | 127.9 | 127.9 |
| <b>59</b> | 119.3 | 119.3 |
| <b>60</b> | 50.2  | 33.4  |
| <b>61</b> | 50.2  | 66.9  |
| <b>62</b> | 6.3   | 25.1  |
| <b>63</b> | 3.8   | 15.1  |
| <b>64</b> | 112.6 | 28.1  |
| <b>65</b> | 101.5 | 101.5 |
| <b>66</b> | 91.5  | 91.5  |
| <b>67</b> | 24.0  | 12.0  |
| <b>68</b> | 11.4  | 5.7   |
| <b>69</b> | 44.4  | 11.1  |
| <b>70</b> | 26.2  | 13.1  |
| <b>71</b> | 99.6  | 99.6  |
| <b>72</b> | 57.0  | 110.6 |
| <b>73</b> | 47.9  | 23.9  |
| <b>74</b> | 23.5  | 15.7  |
| <b>75</b> | 6.2   | 12.3  |
| <b>76</b> | 15.7  | 31.3  |
| <b>77</b> | 10.4  | 27.6  |
| <b>78</b> | 20.7  | 55.2  |
| <b>79</b> | 4.5   | 23.9  |
| <b>80</b> | 14.1  | 36.2  |
| <b>81</b> | 87.5  | 87.5  |
| <b>82</b> | 94.8  | 94.8  |
| <b>83</b> | 24.9  | 12.4  |
| <b>84</b> | 6.6   | 13.1  |
| <b>85</b> | 2.9   | 5.9   |
| <b>86</b> | 2.1   | 5.6   |

II. Representative  $^1\text{H}$  and  $^{13}\text{C}$  NMR Spectra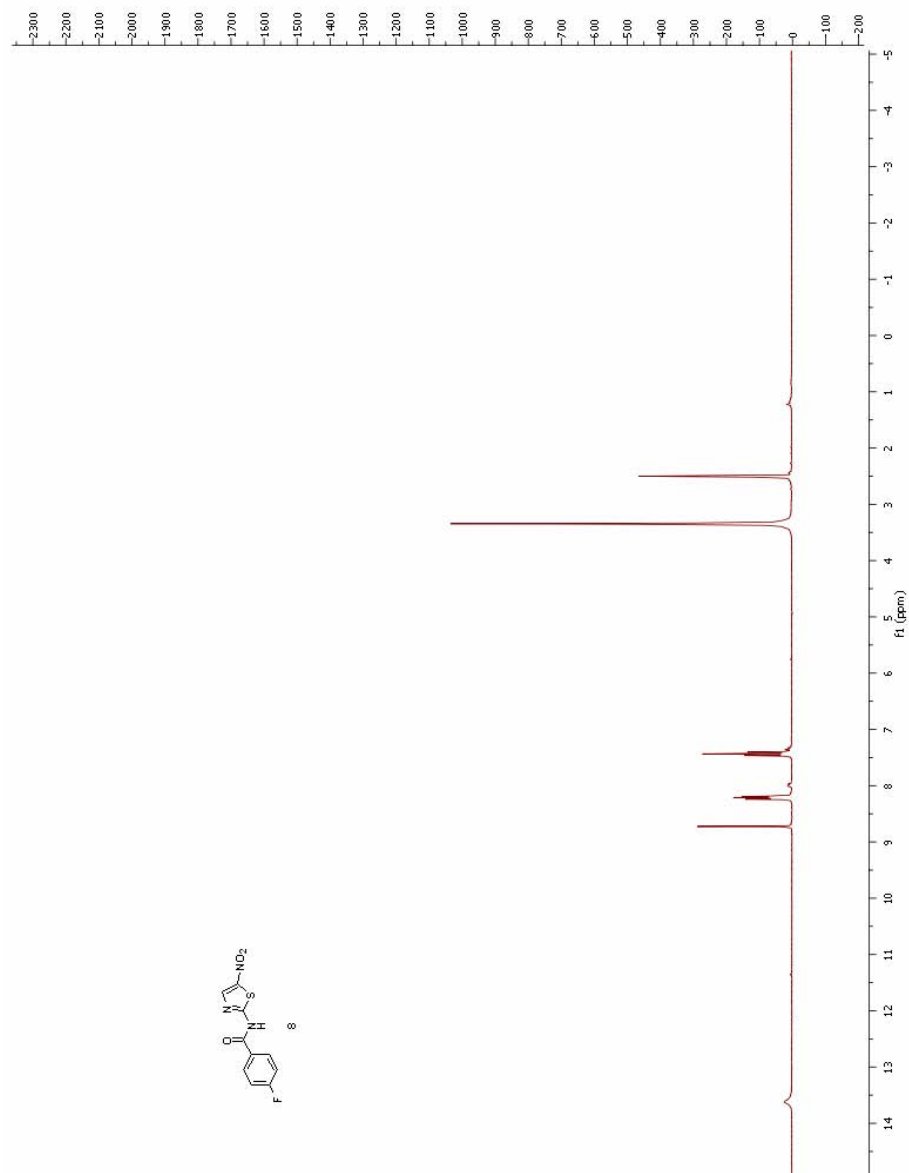

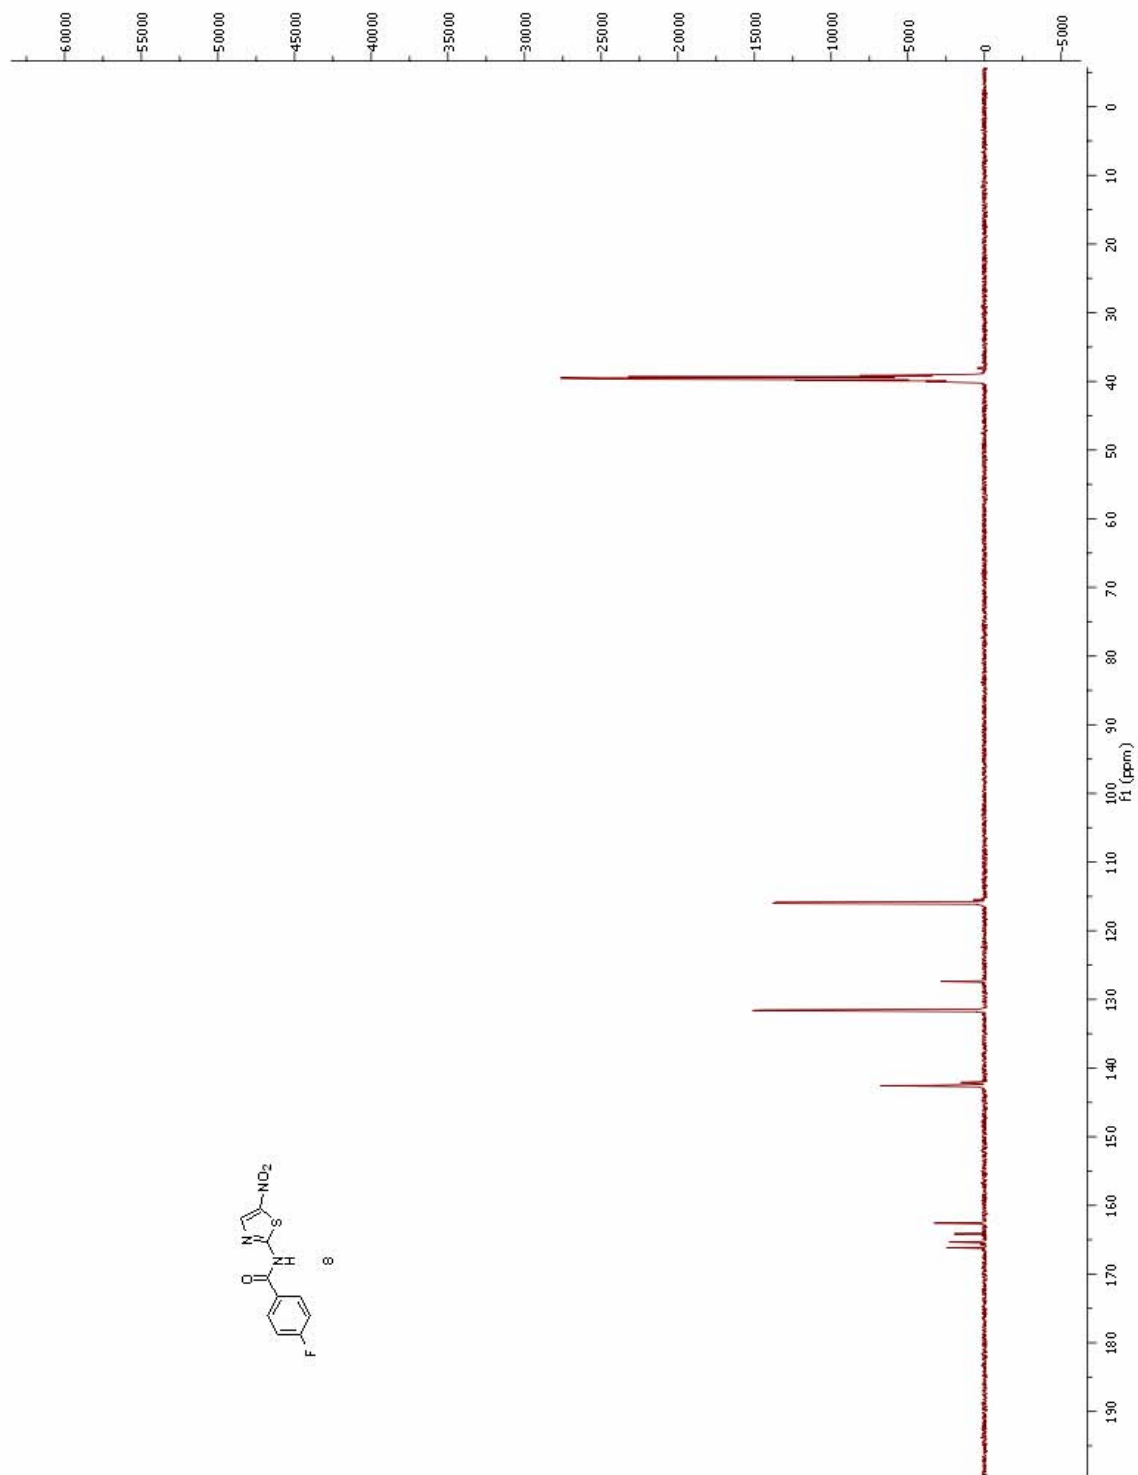

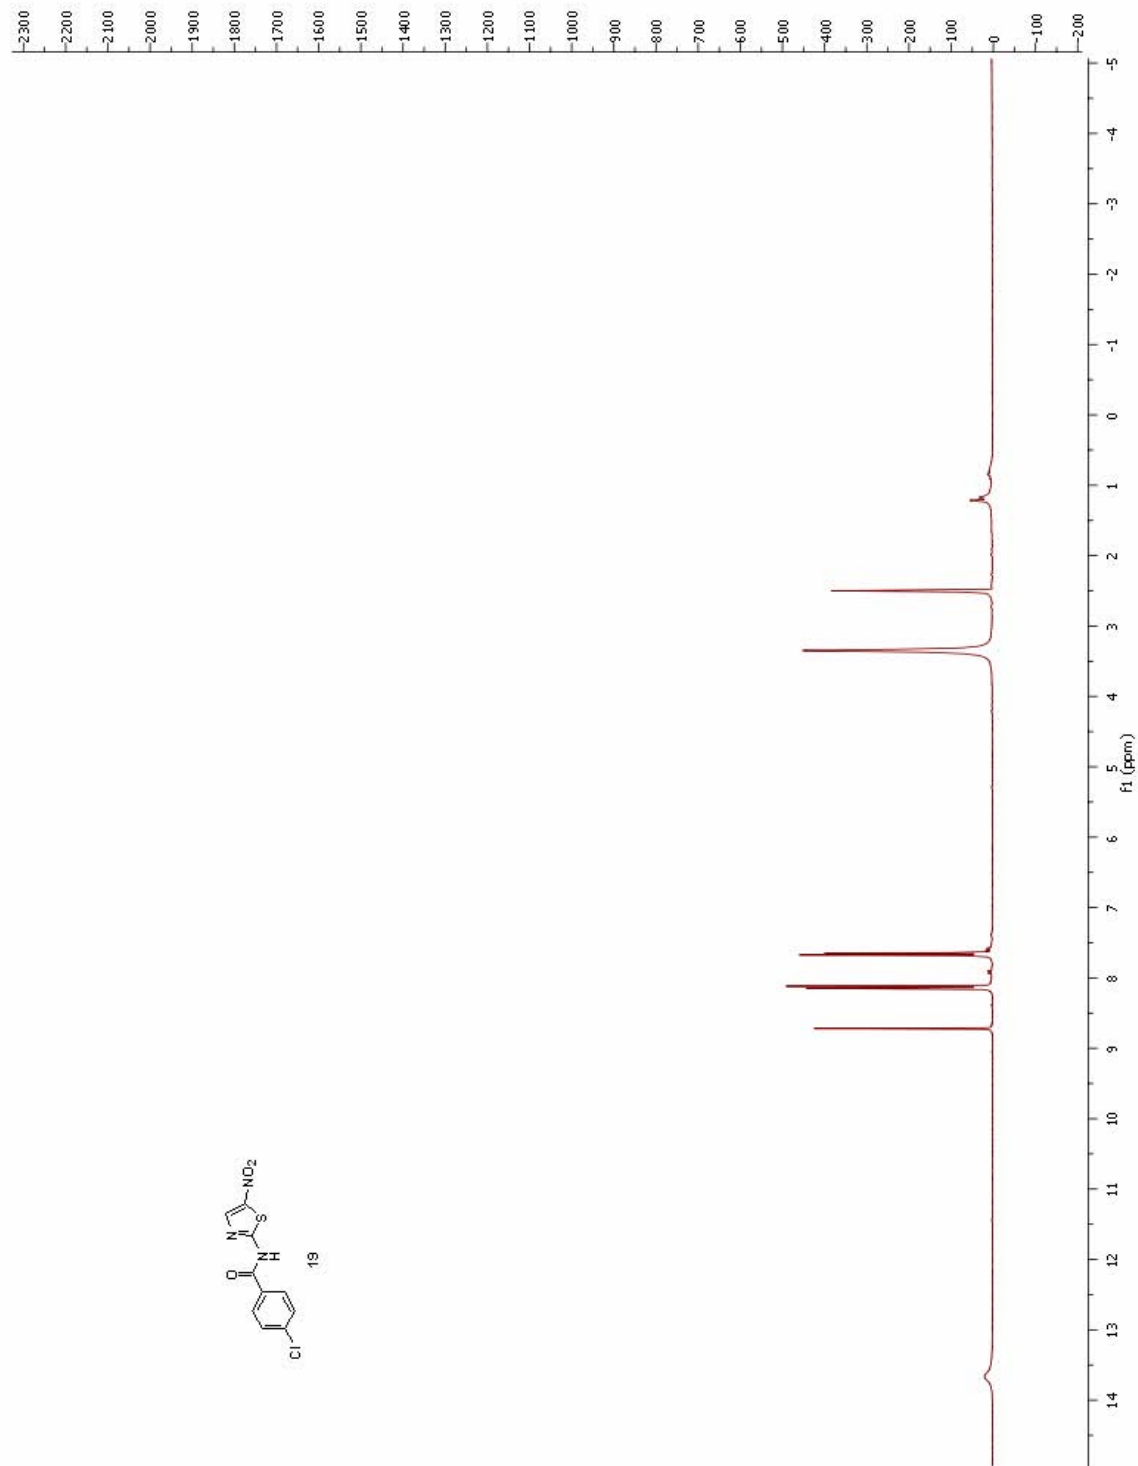

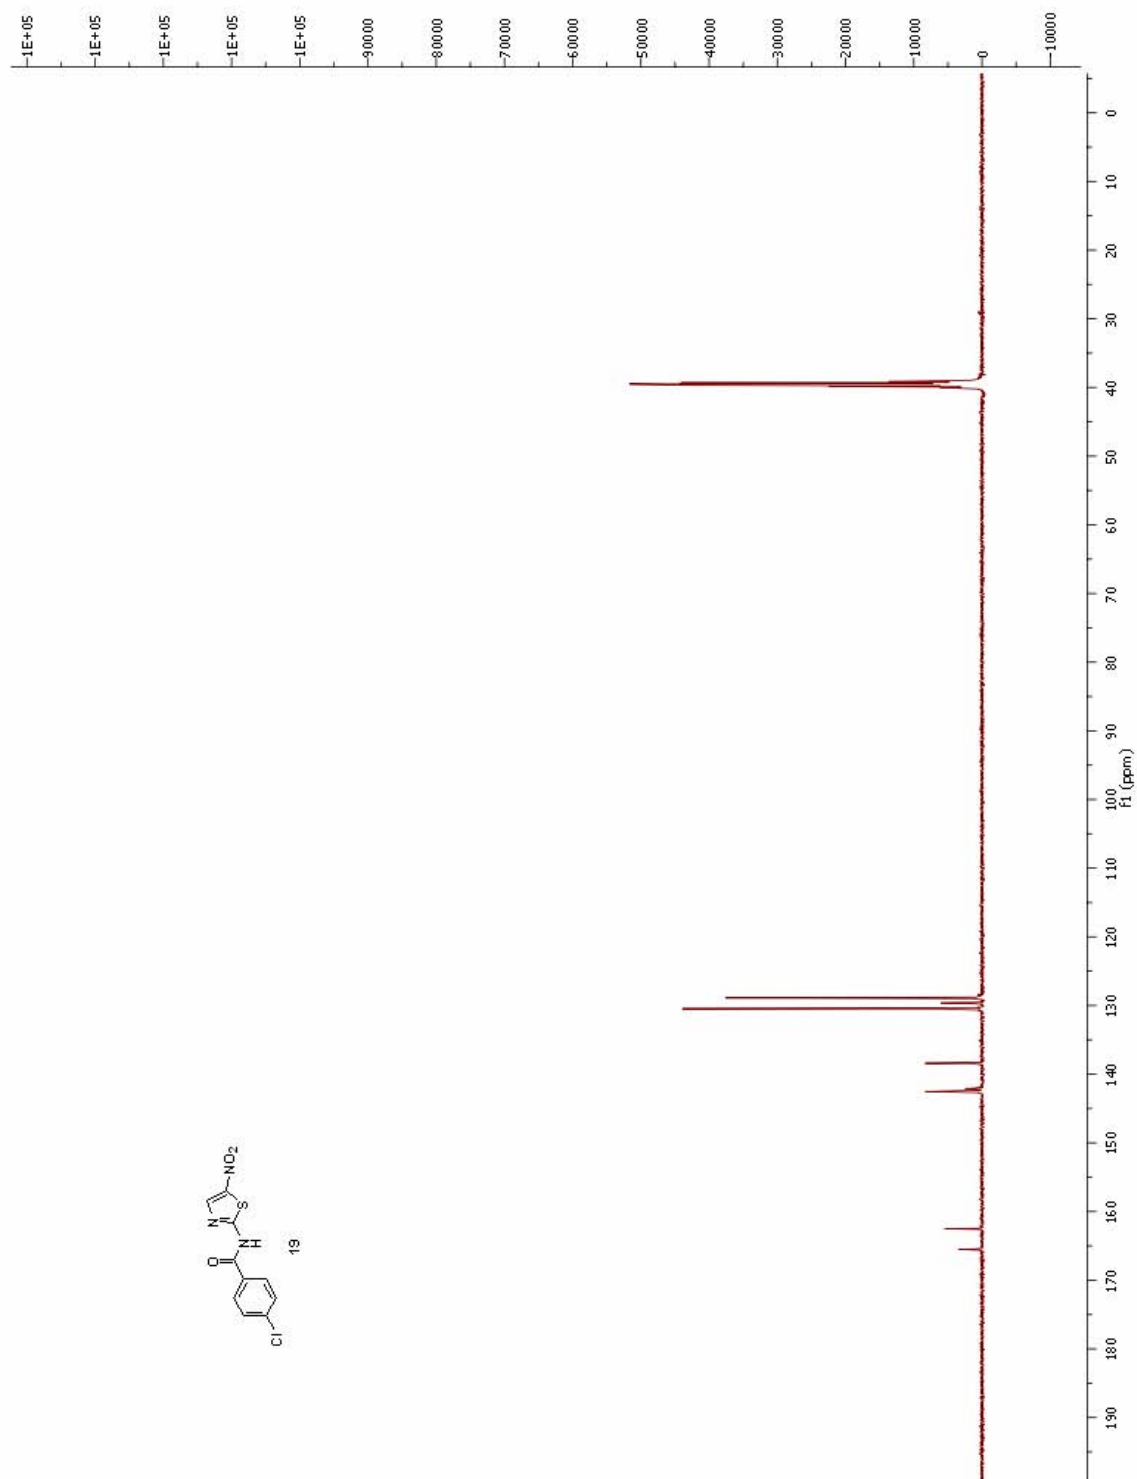

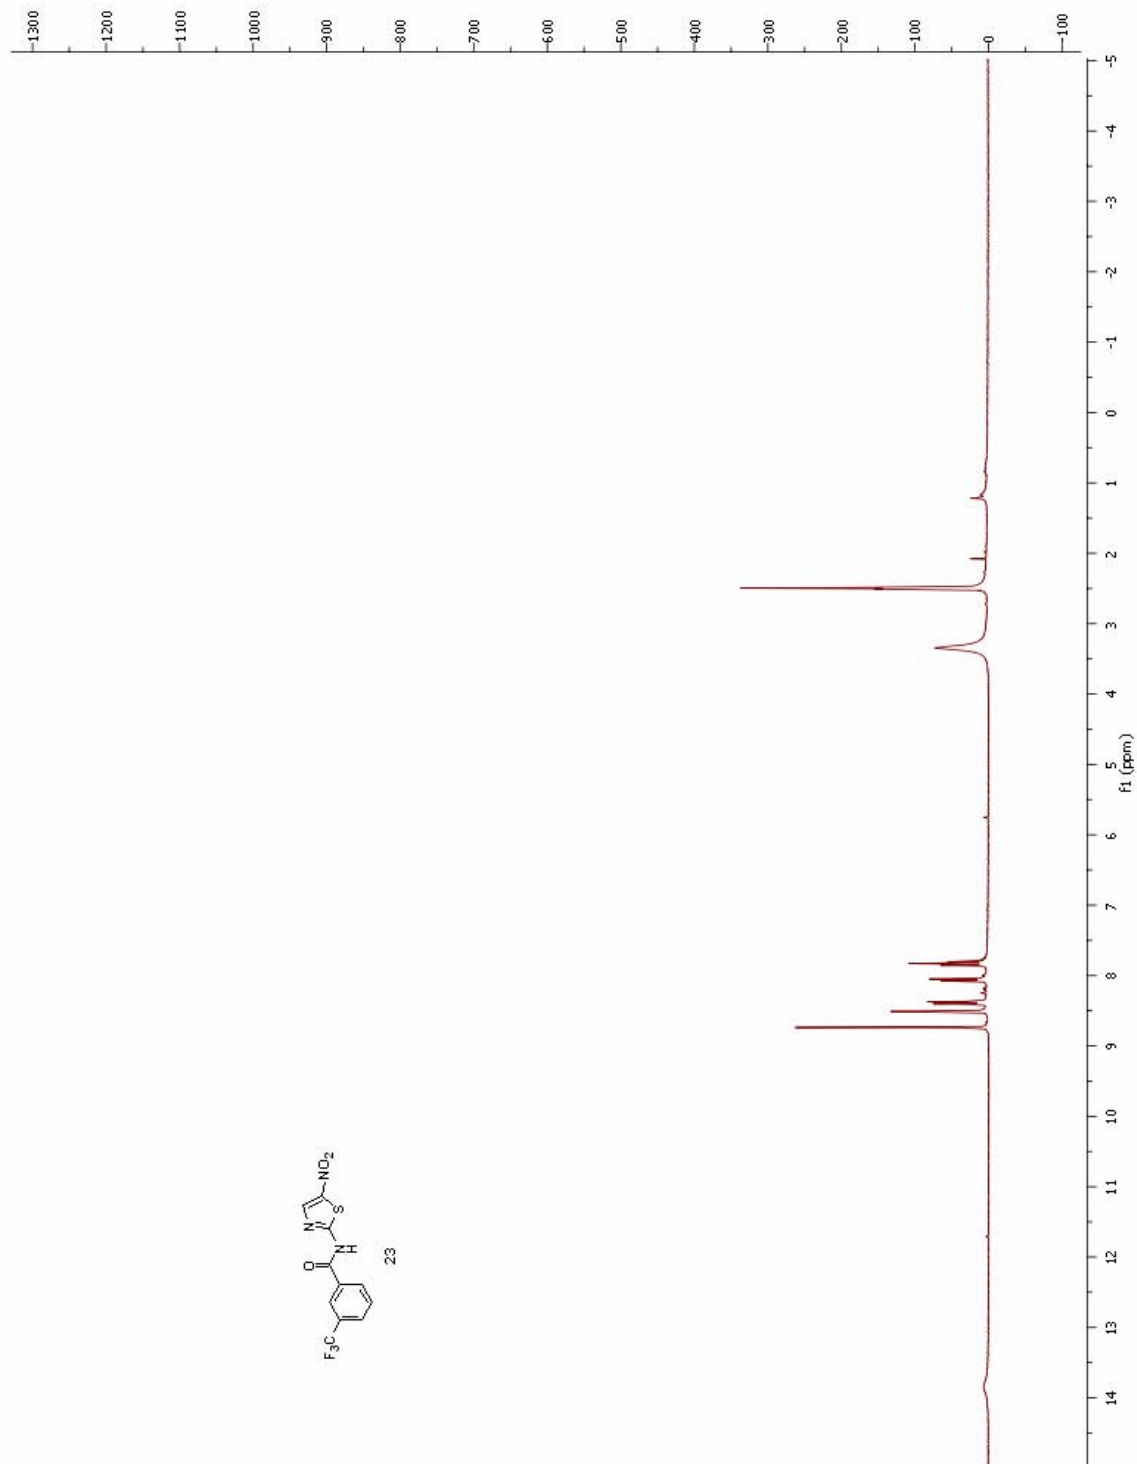

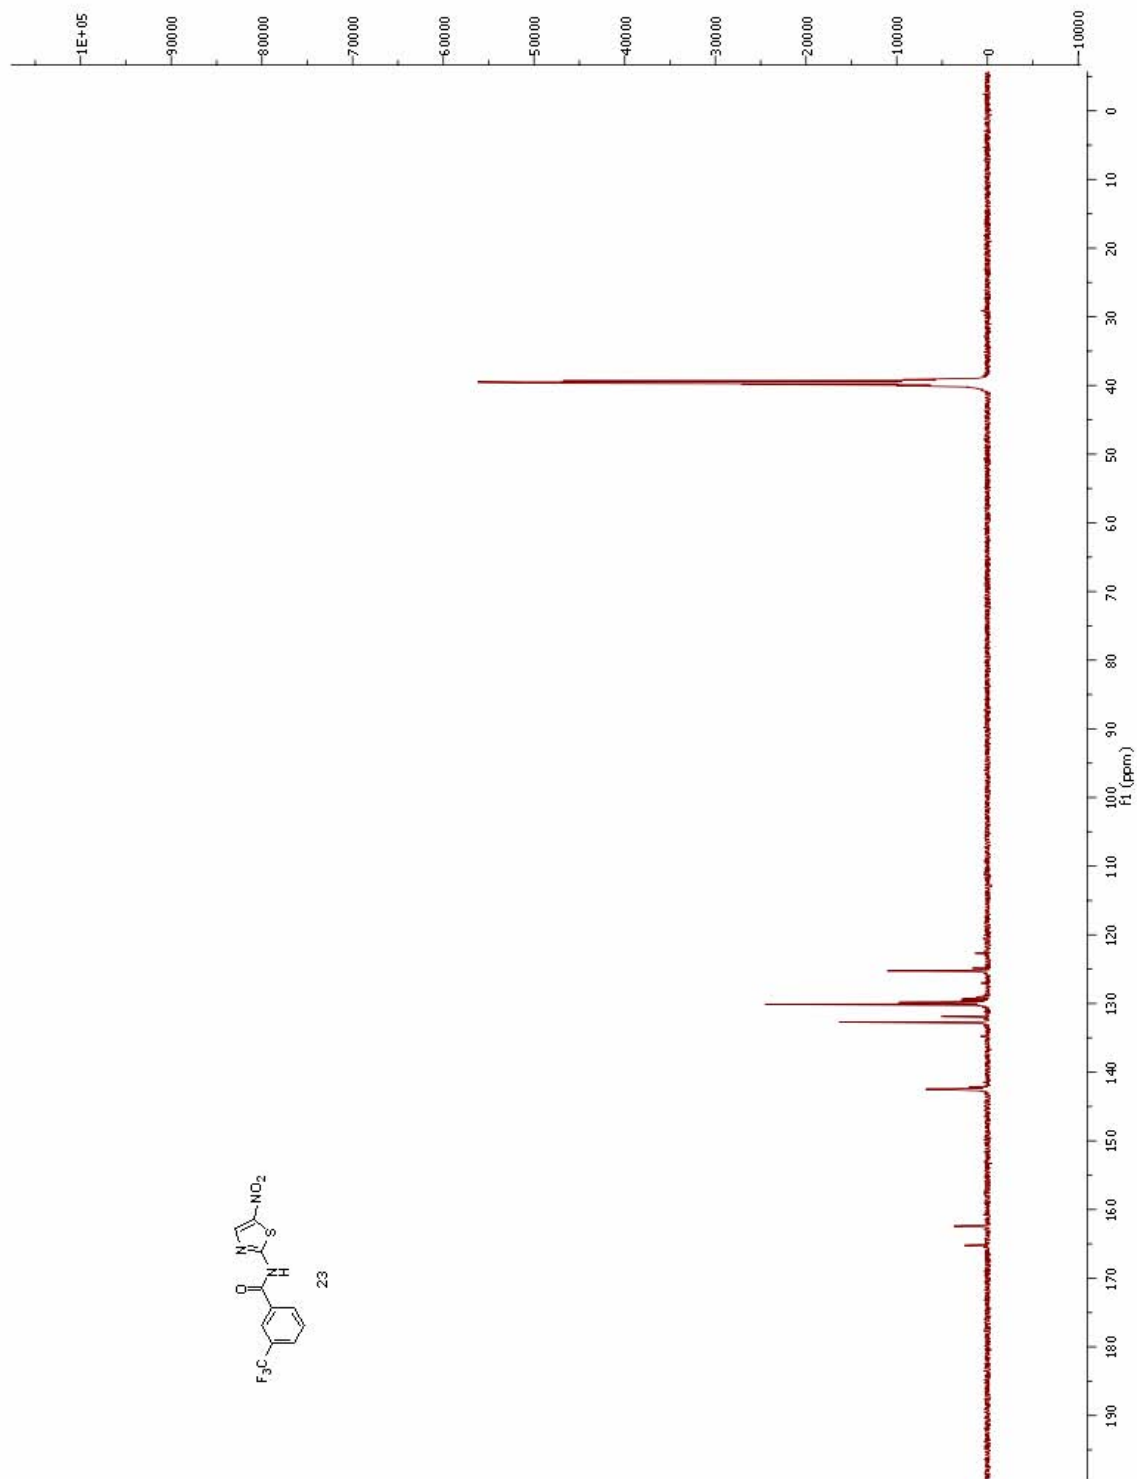



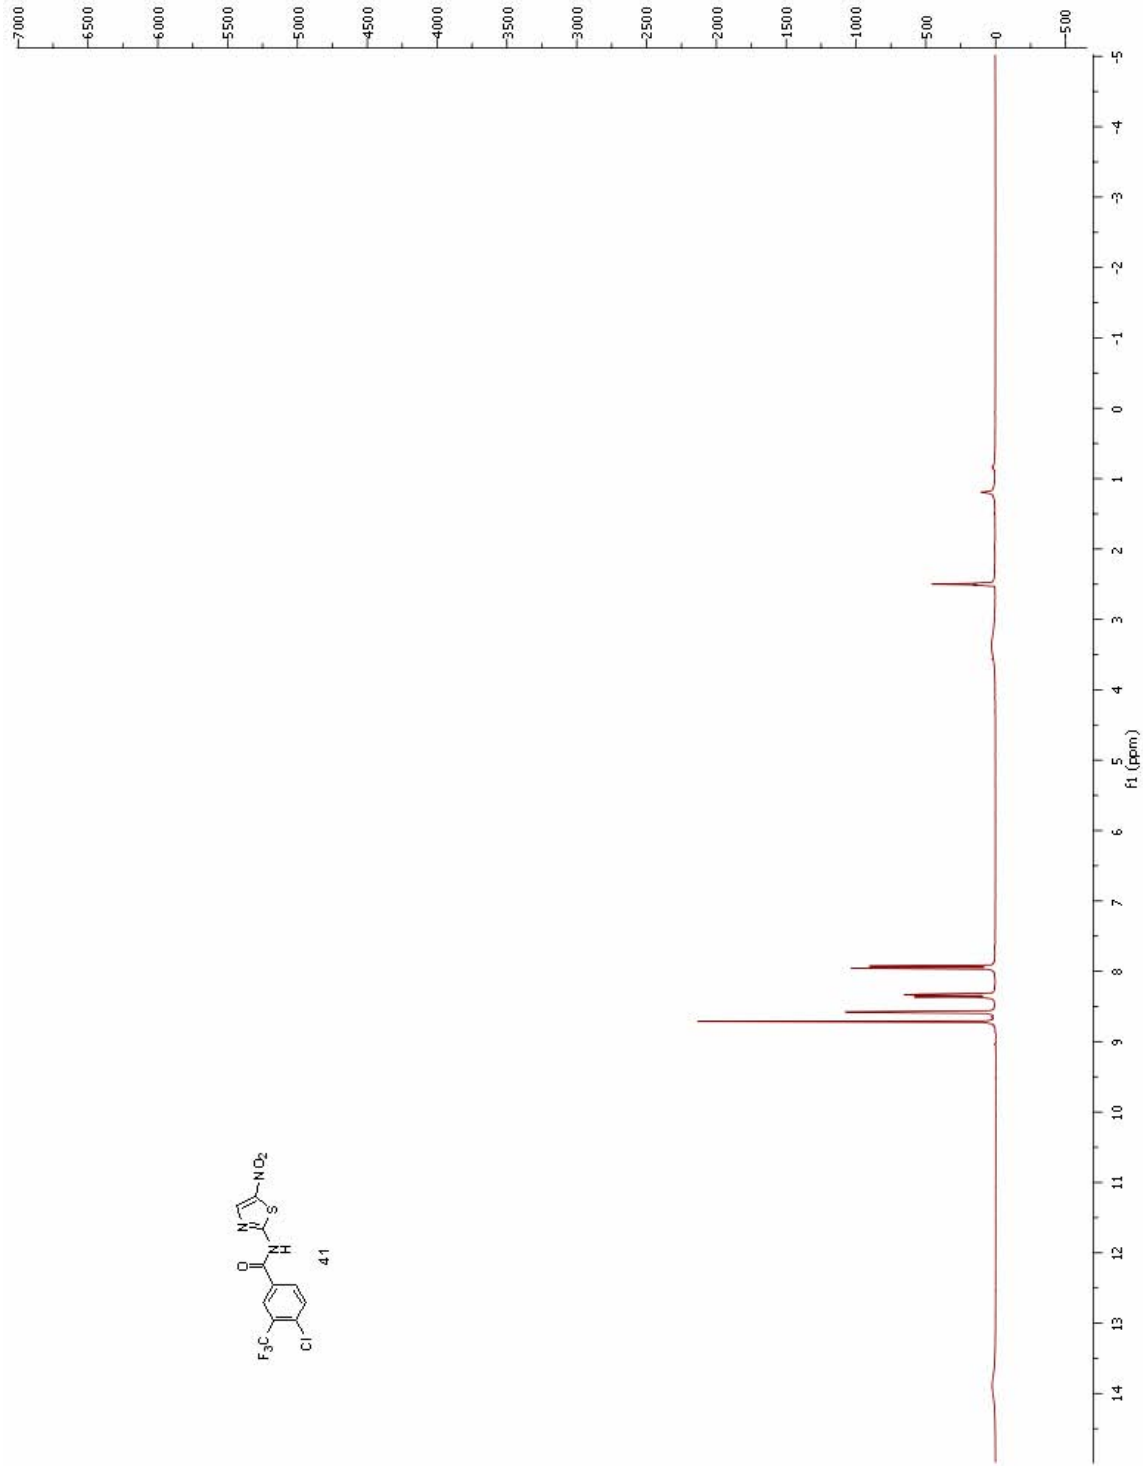

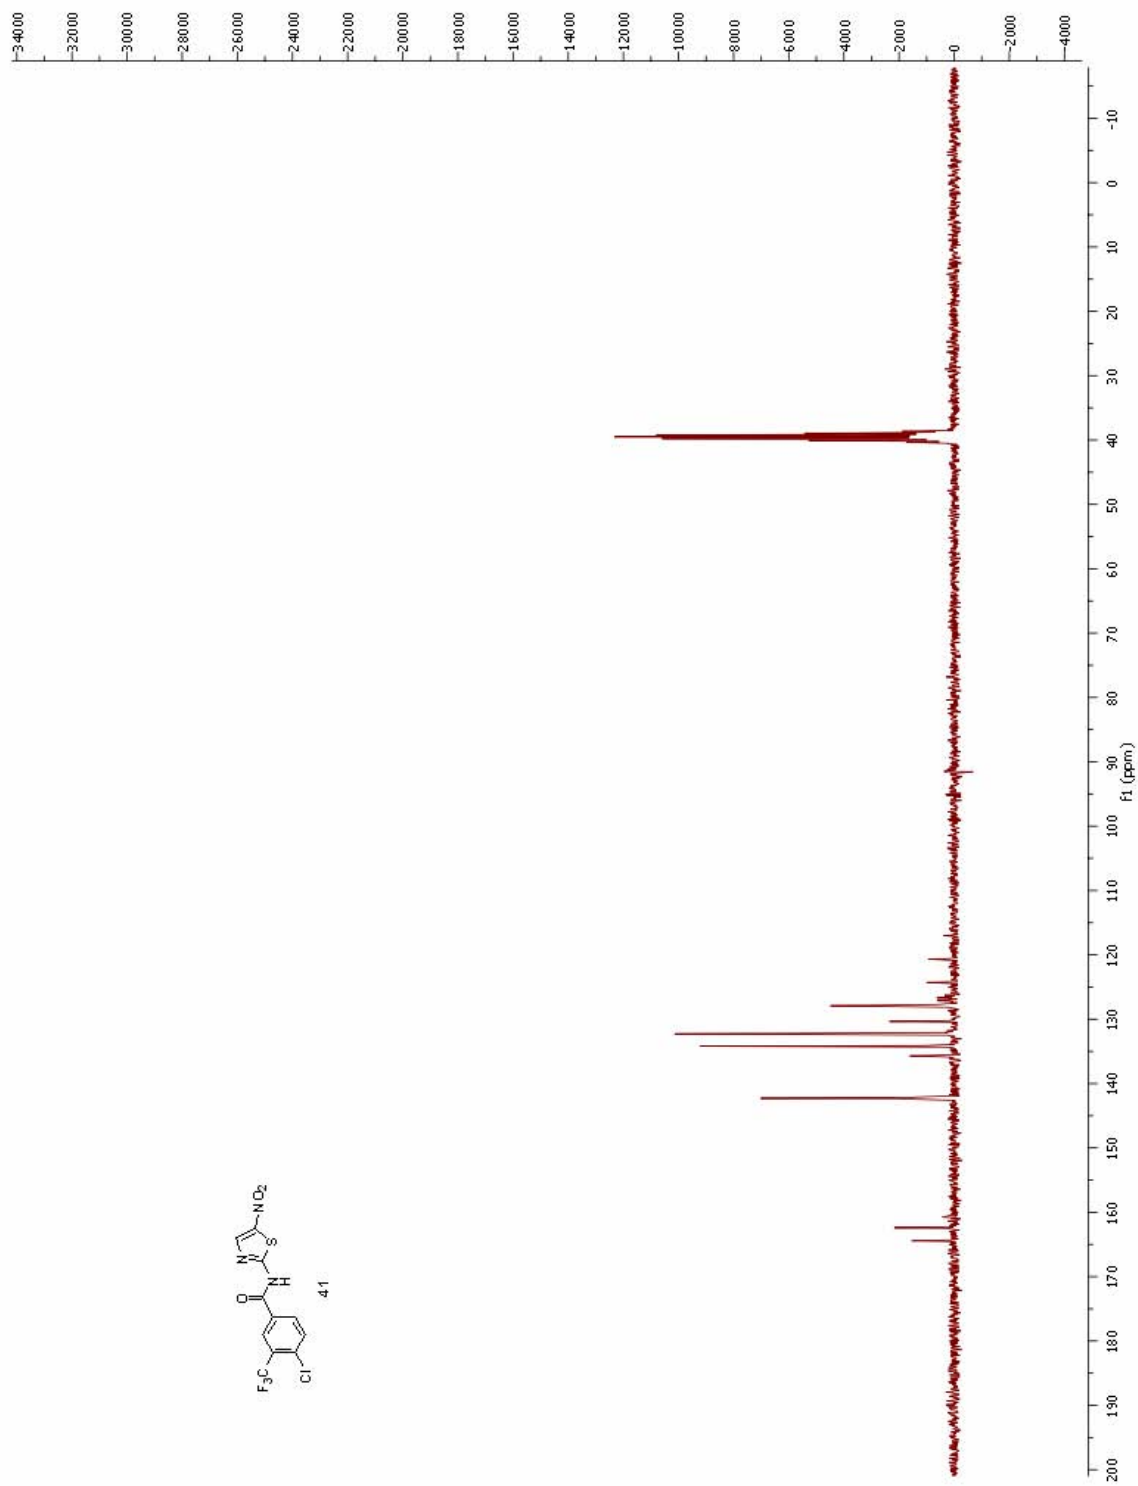

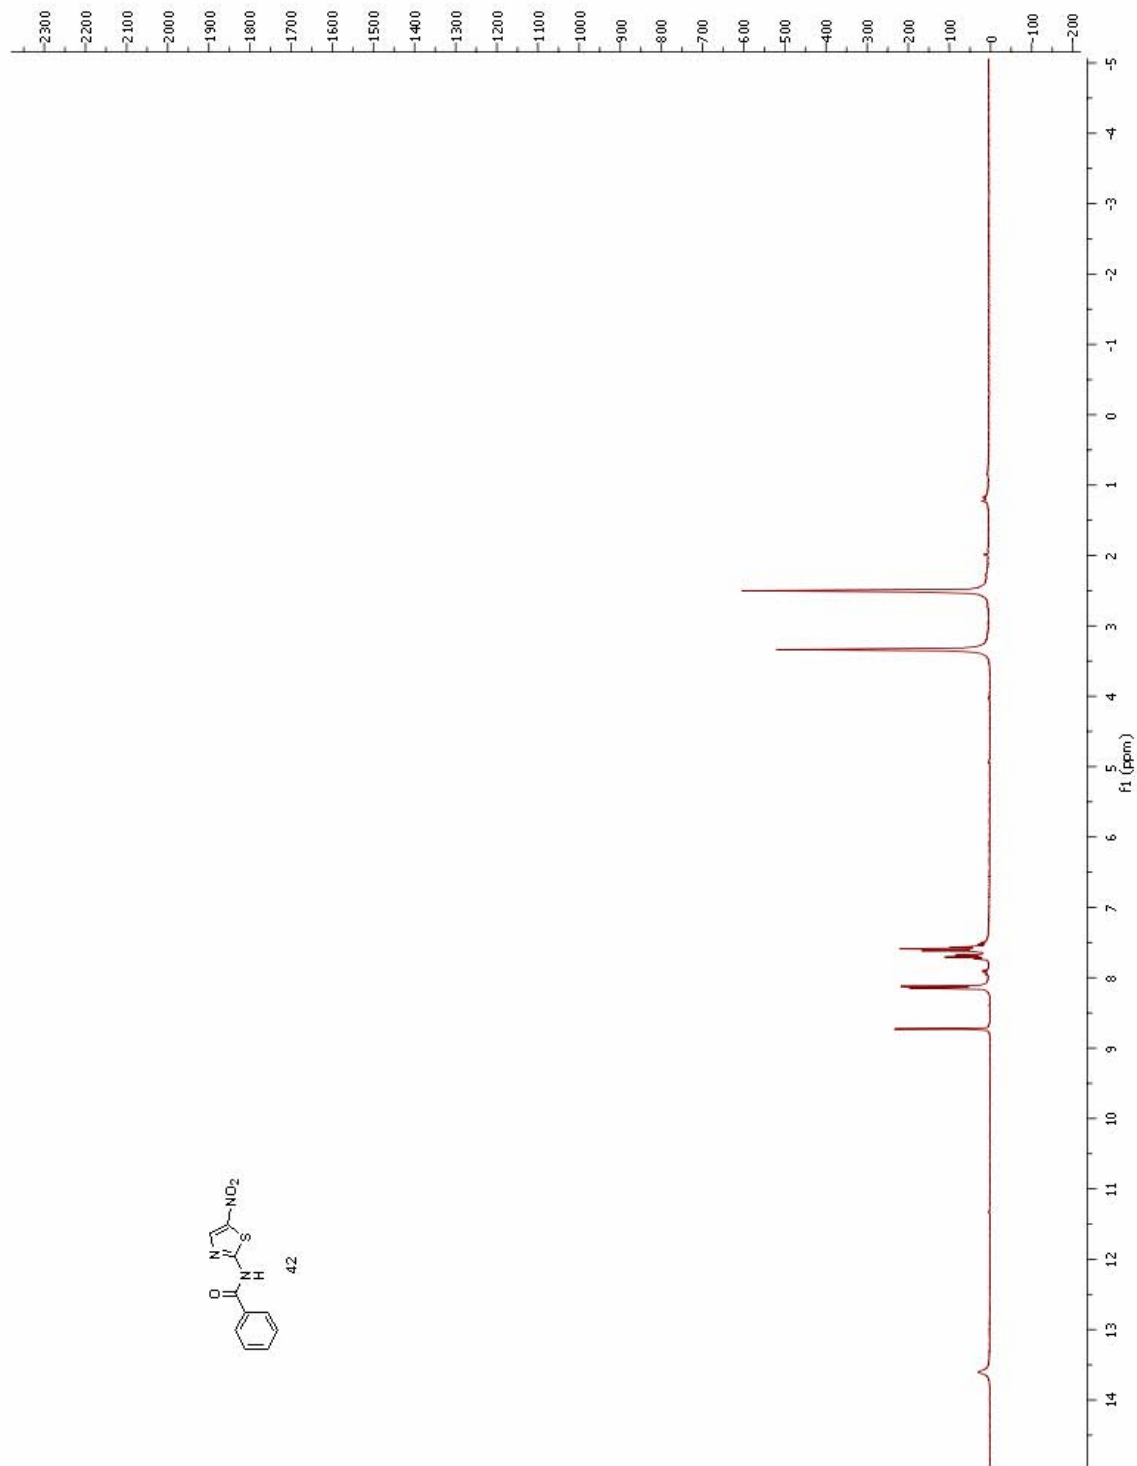

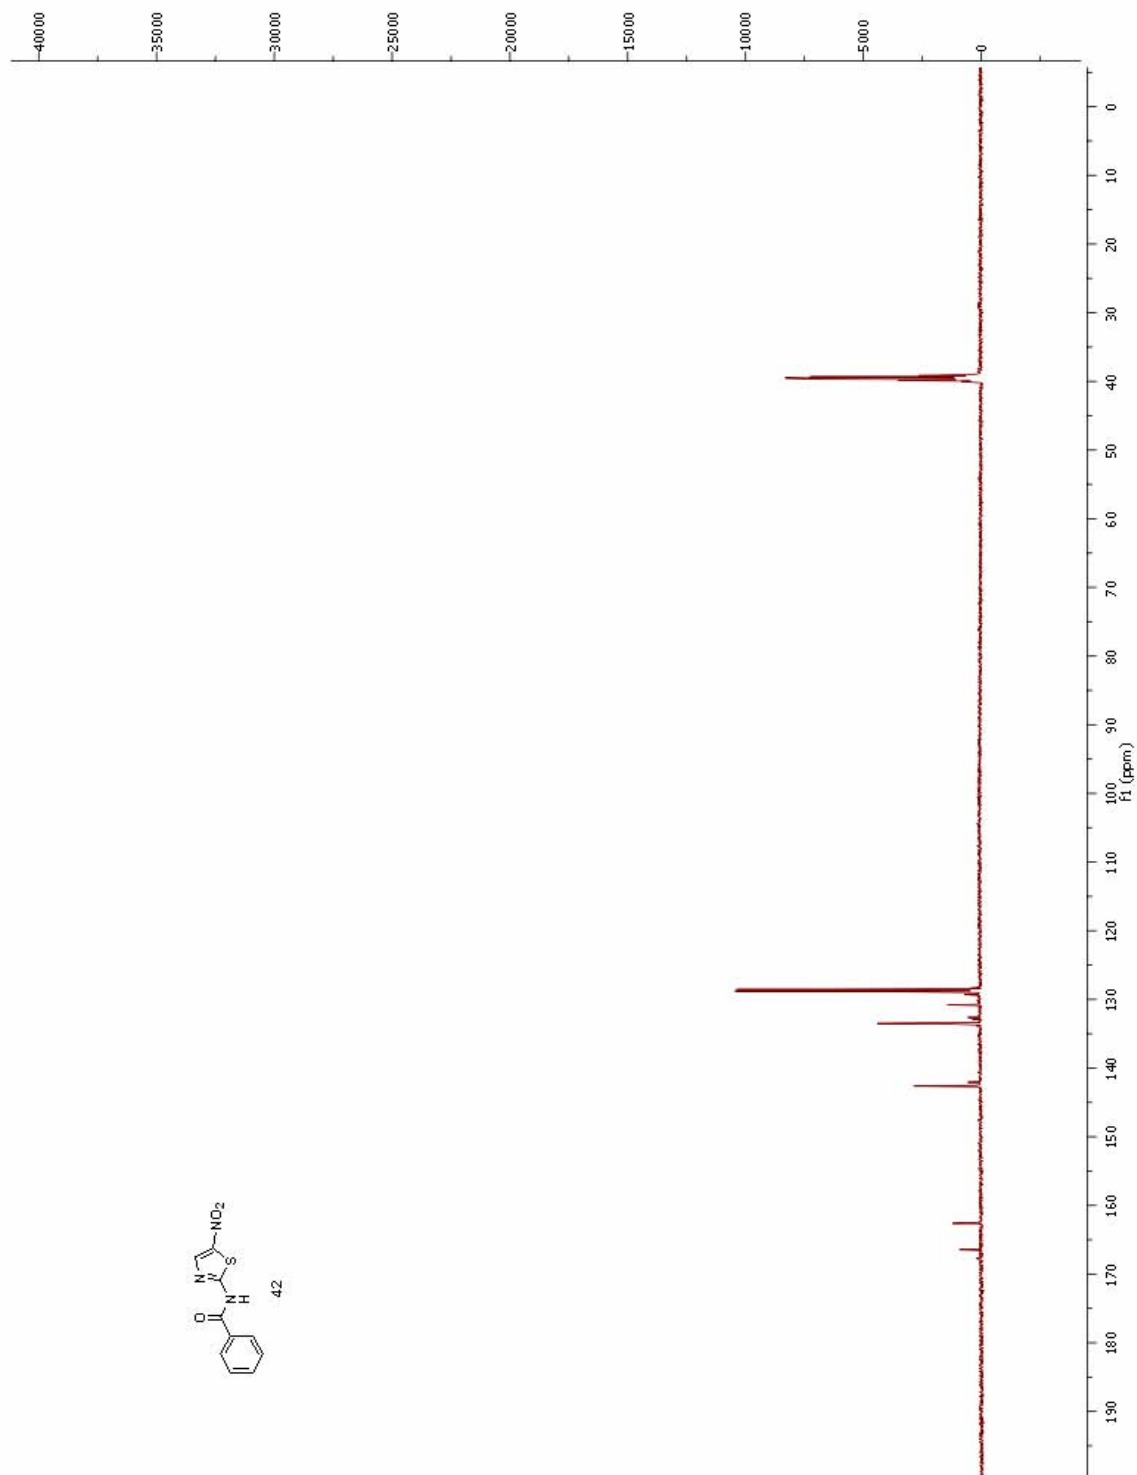

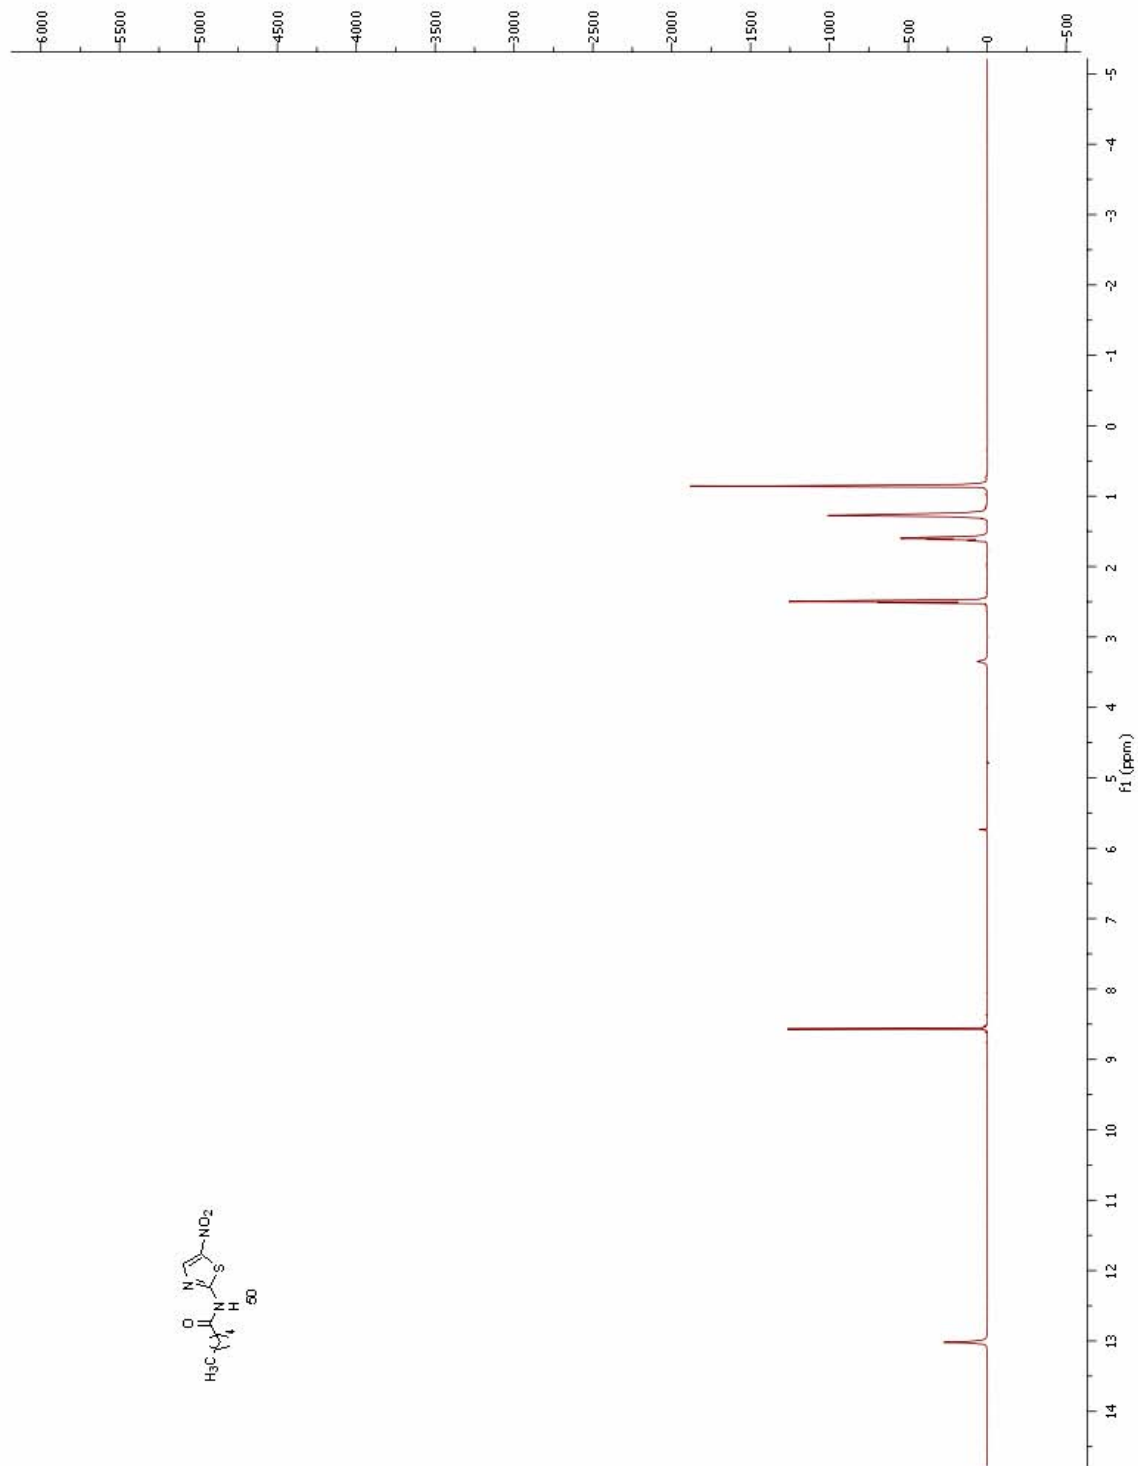

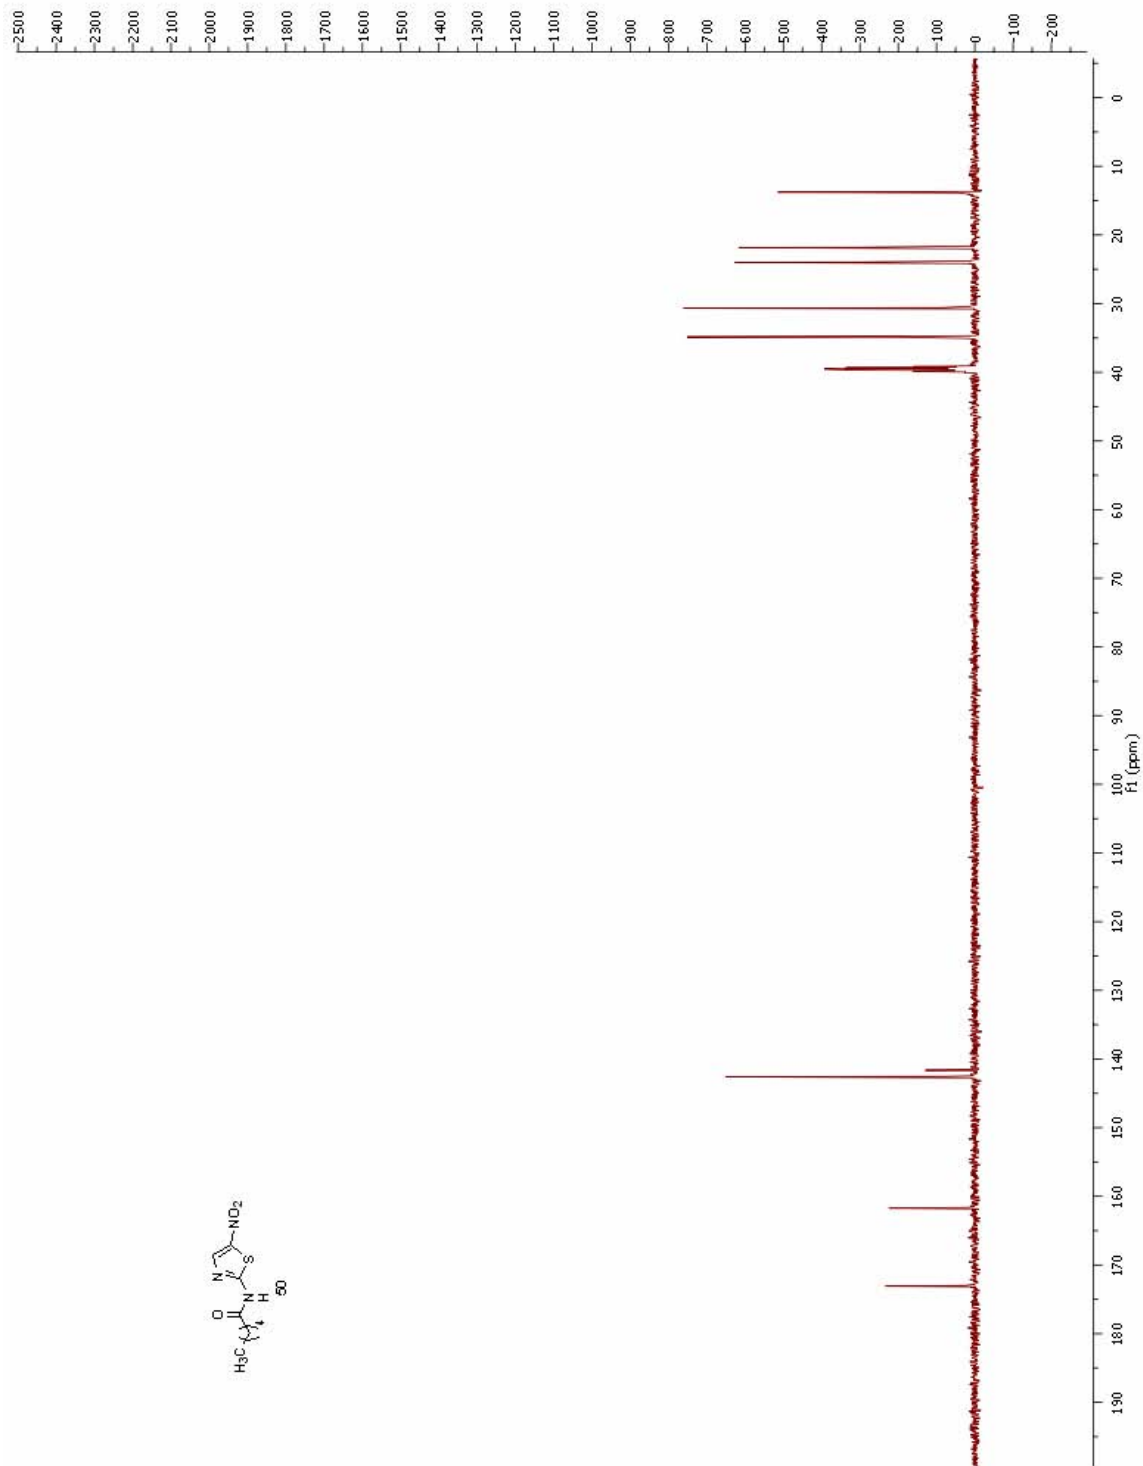

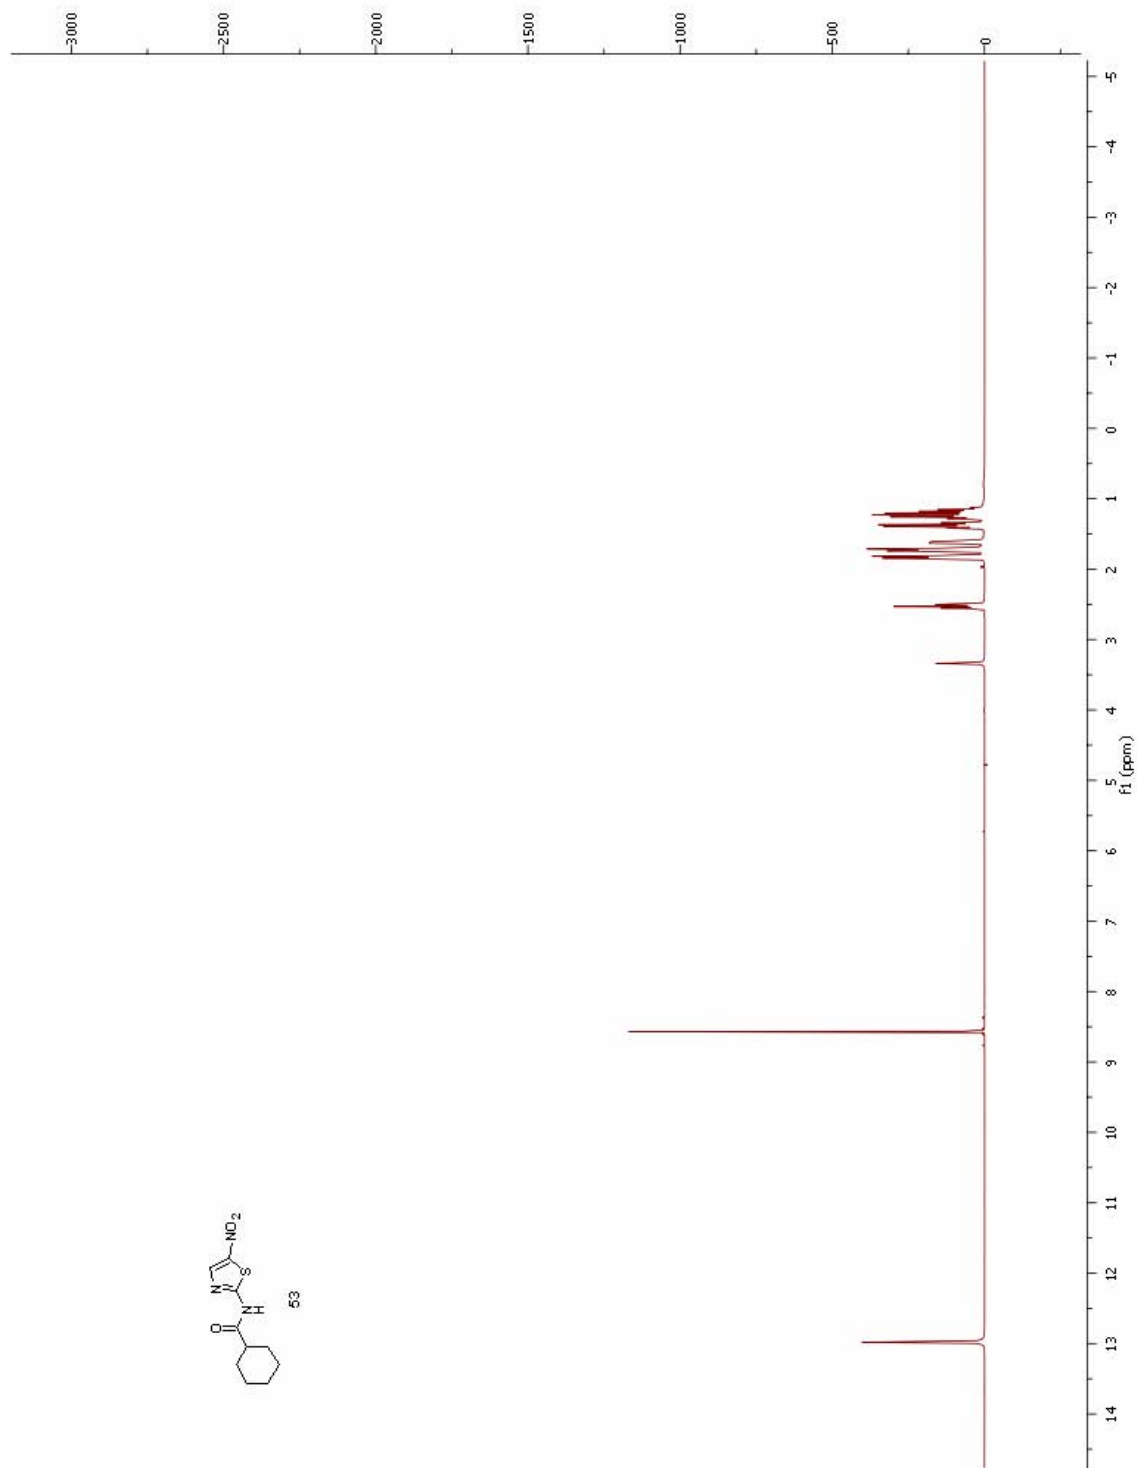

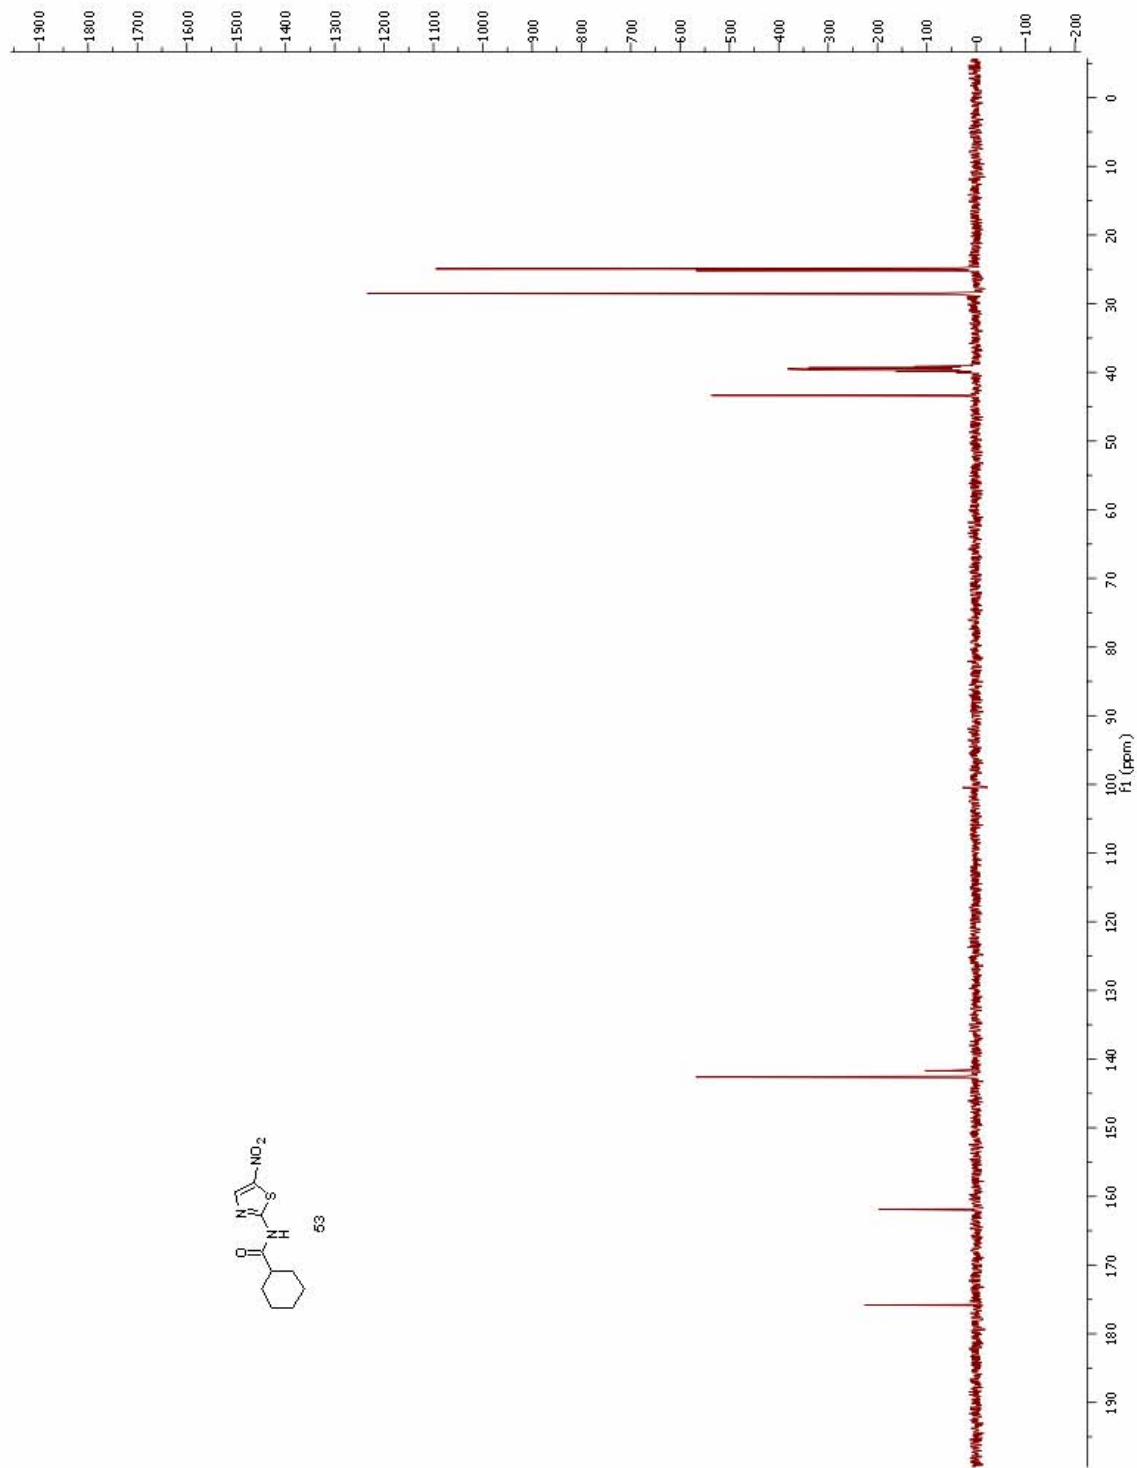



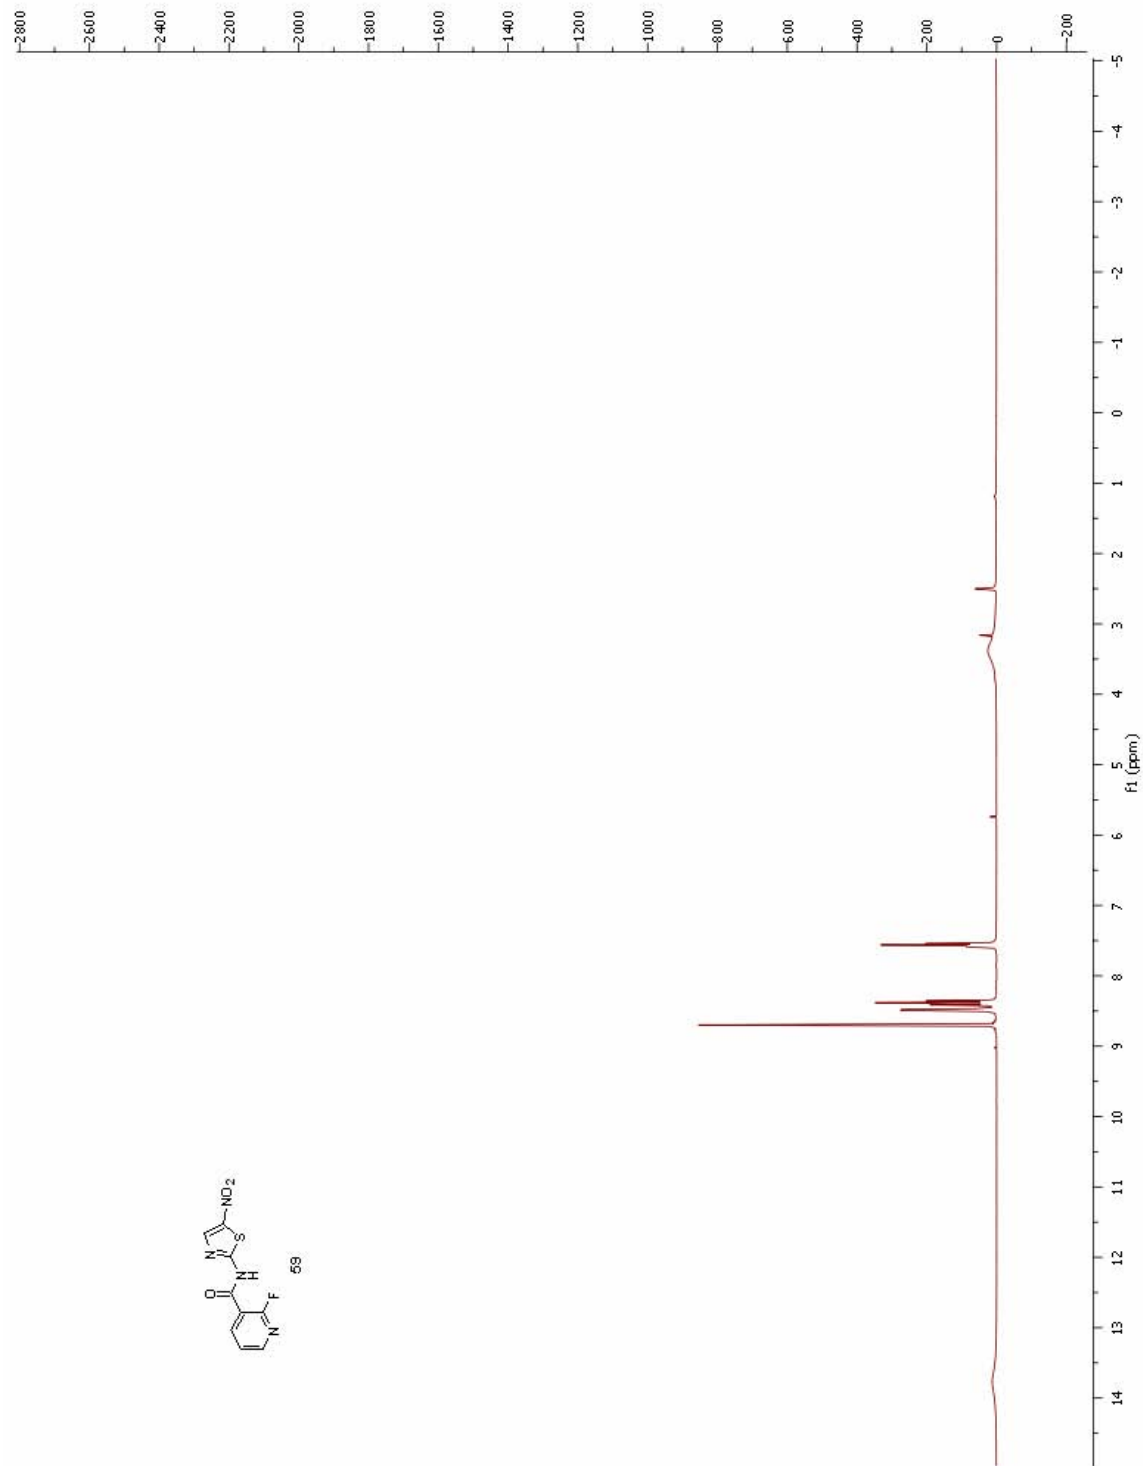

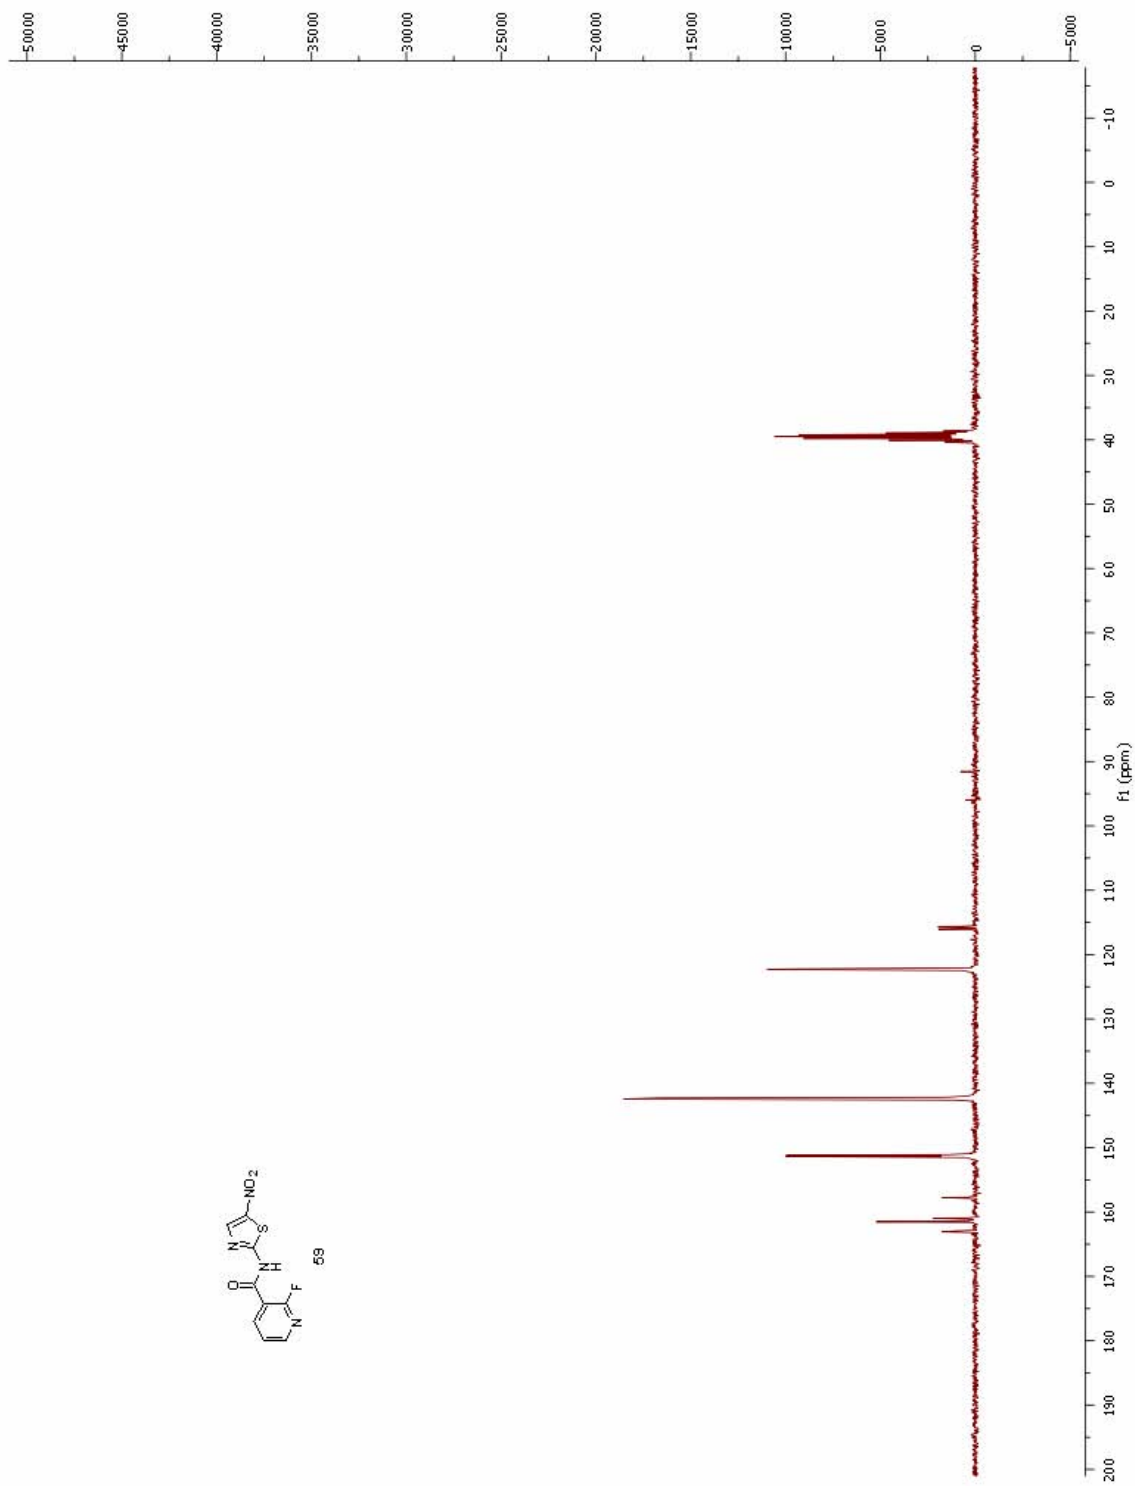

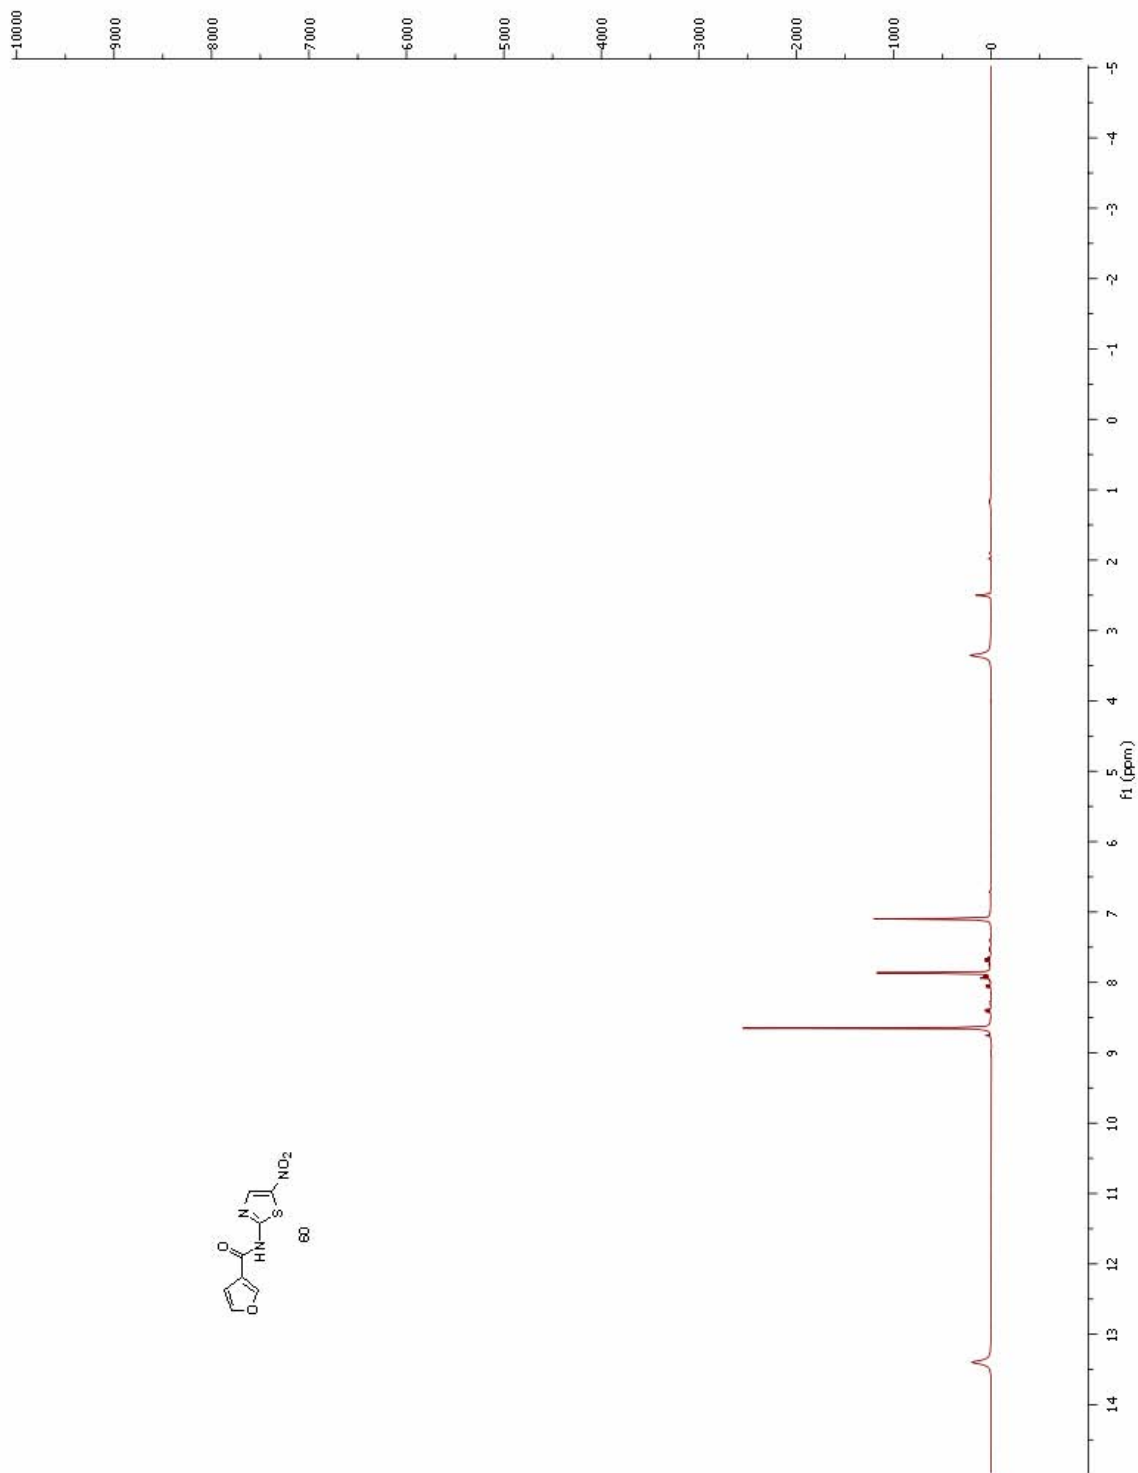

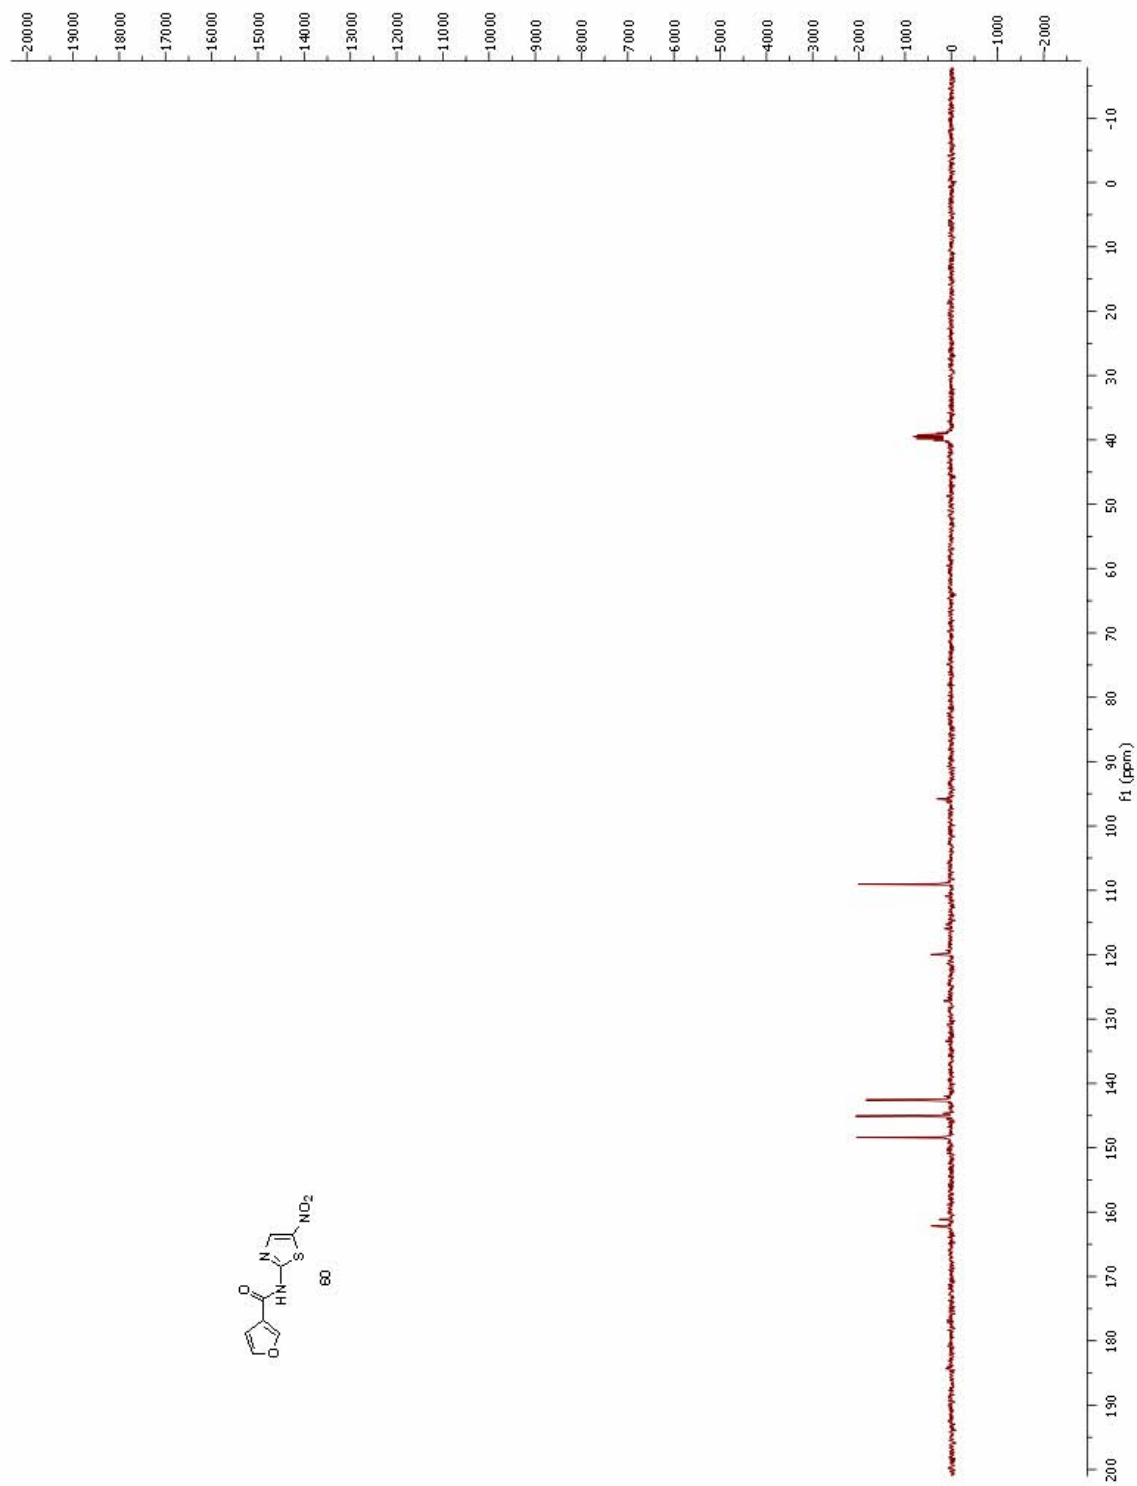

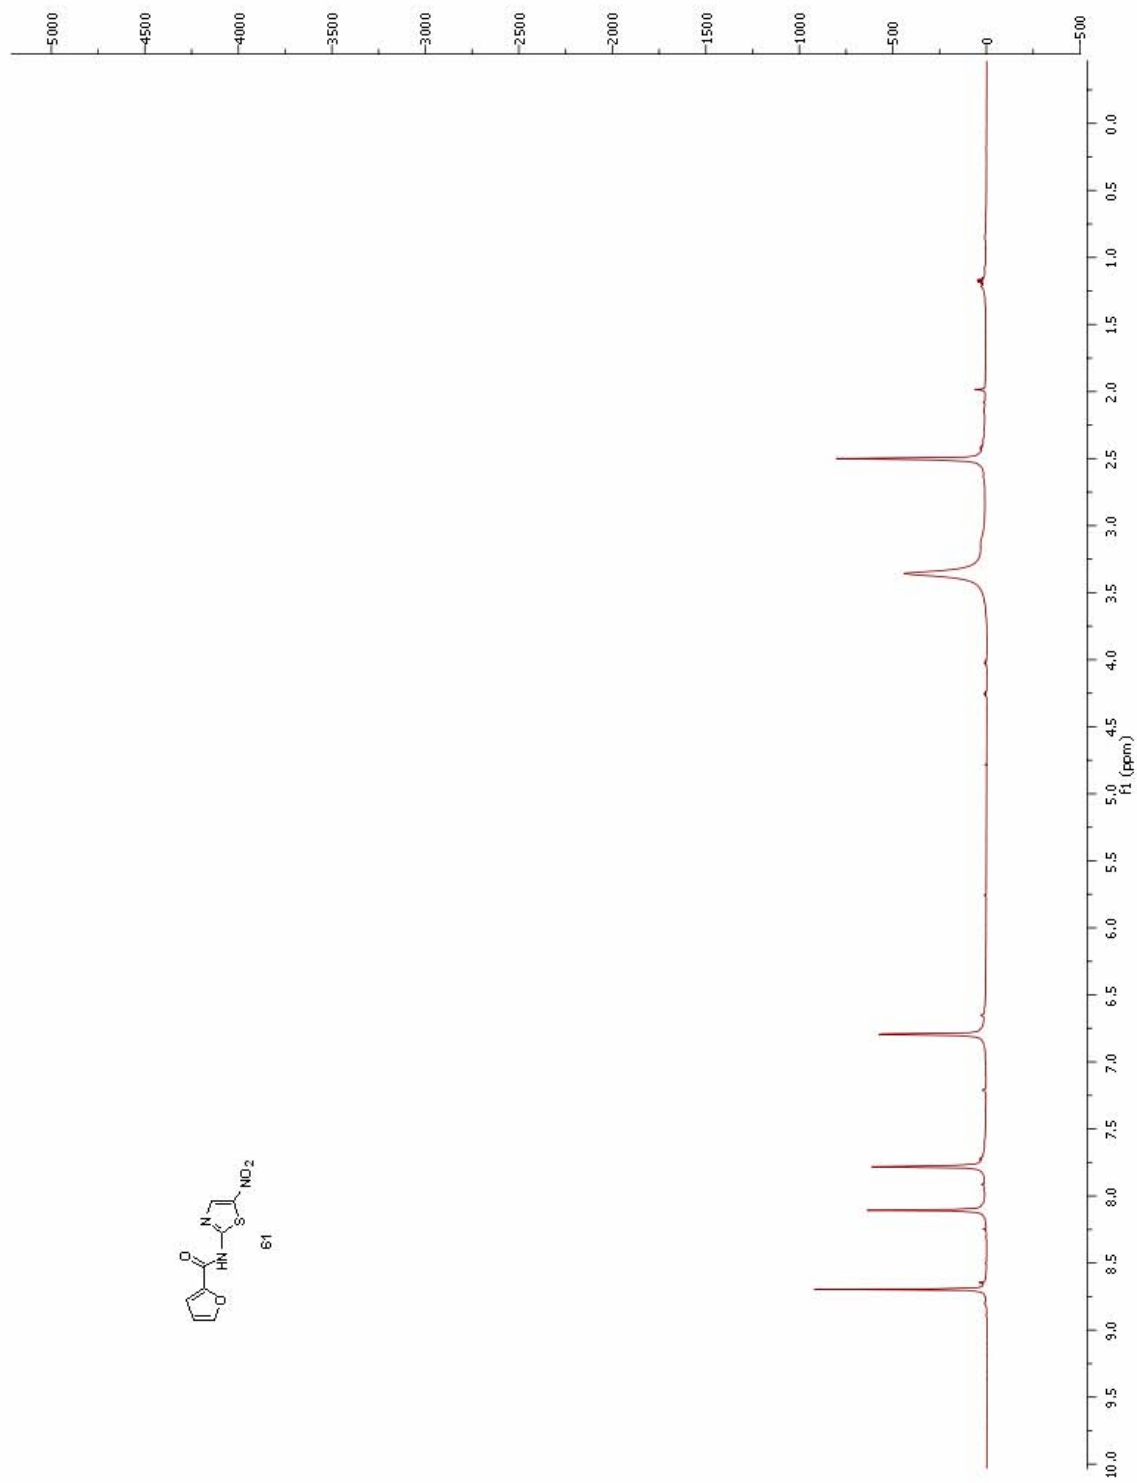

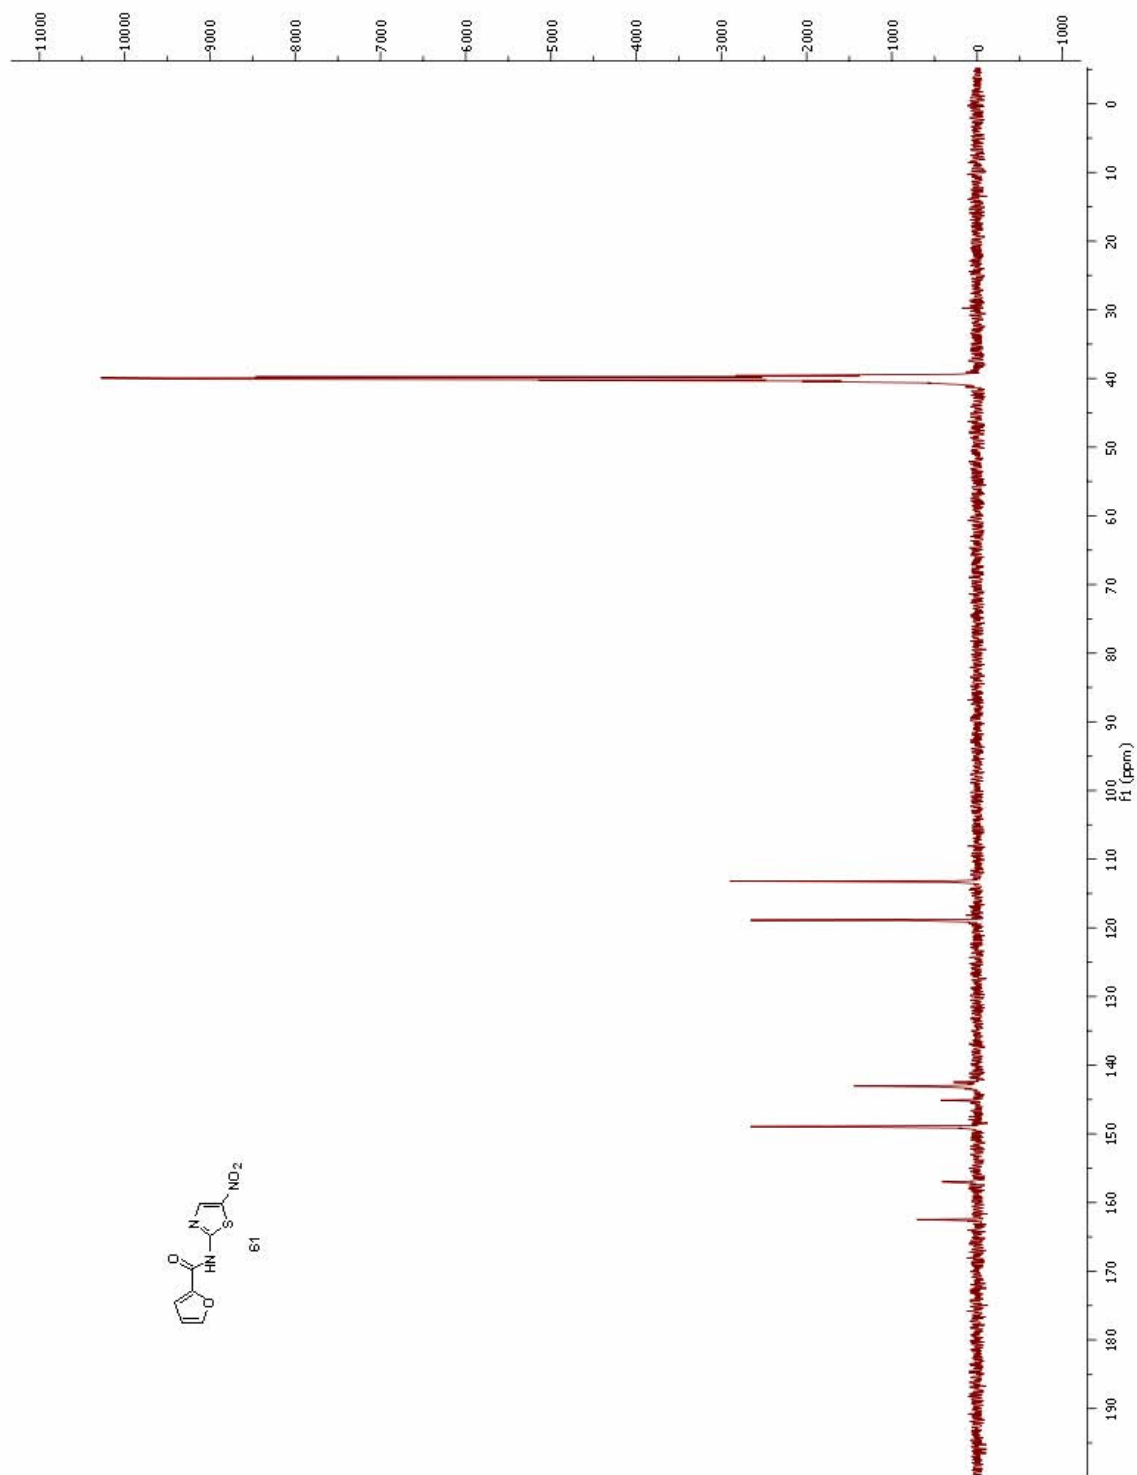

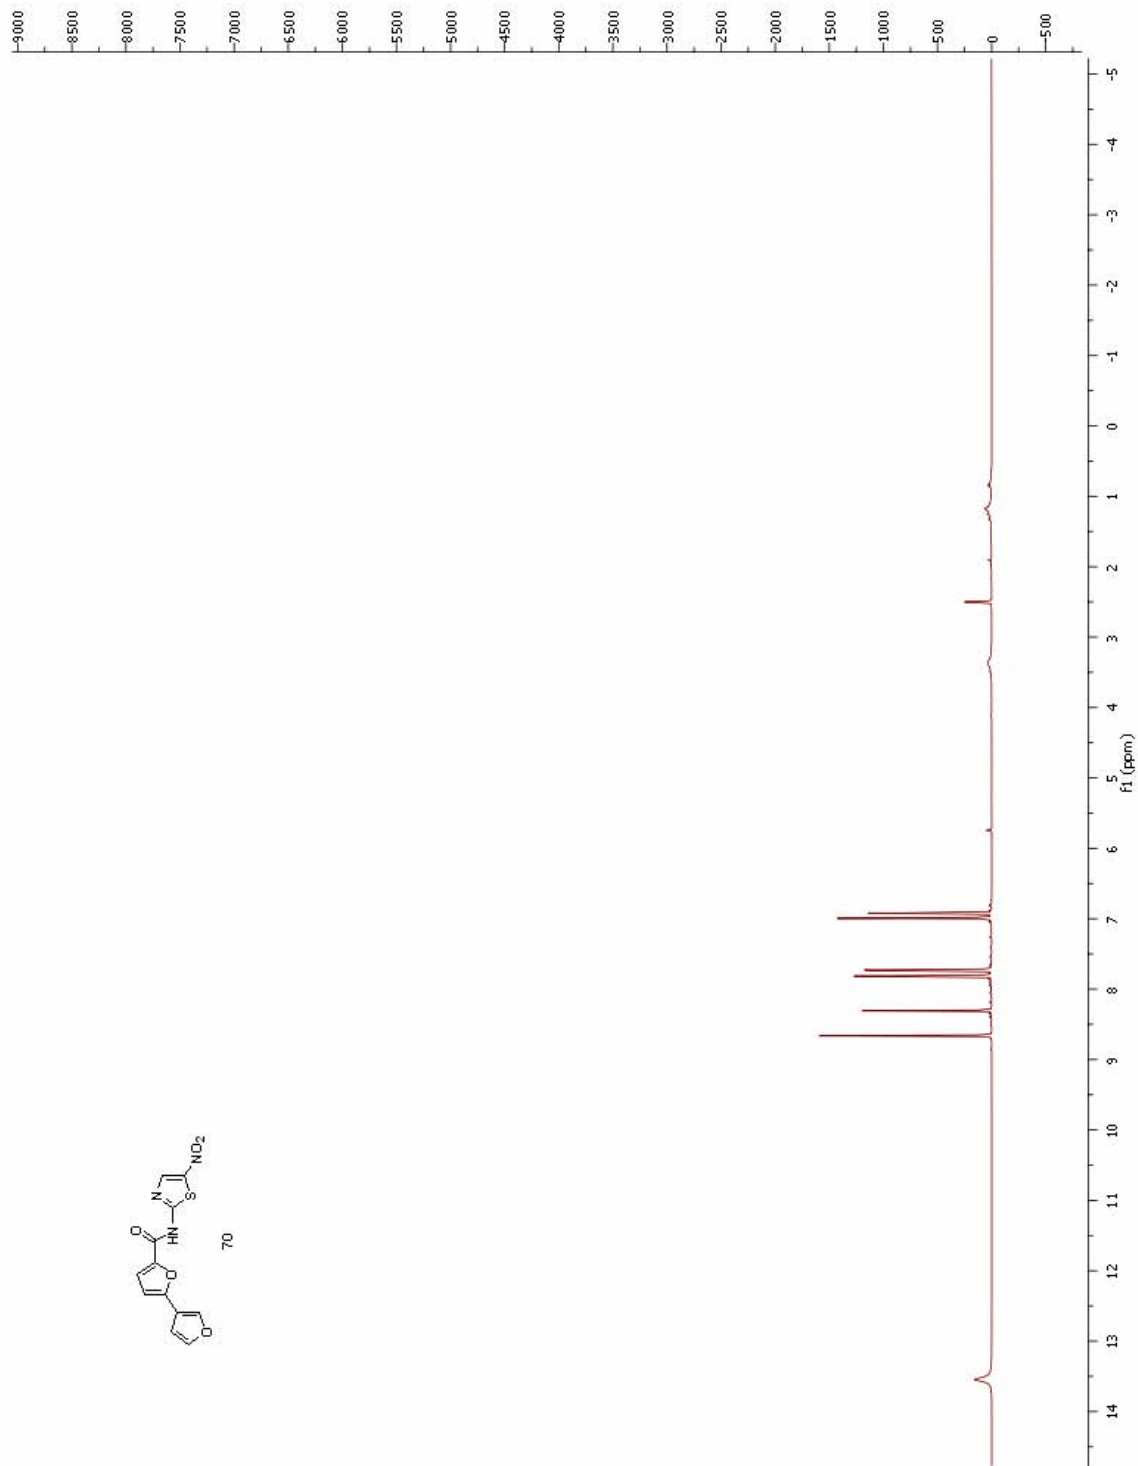

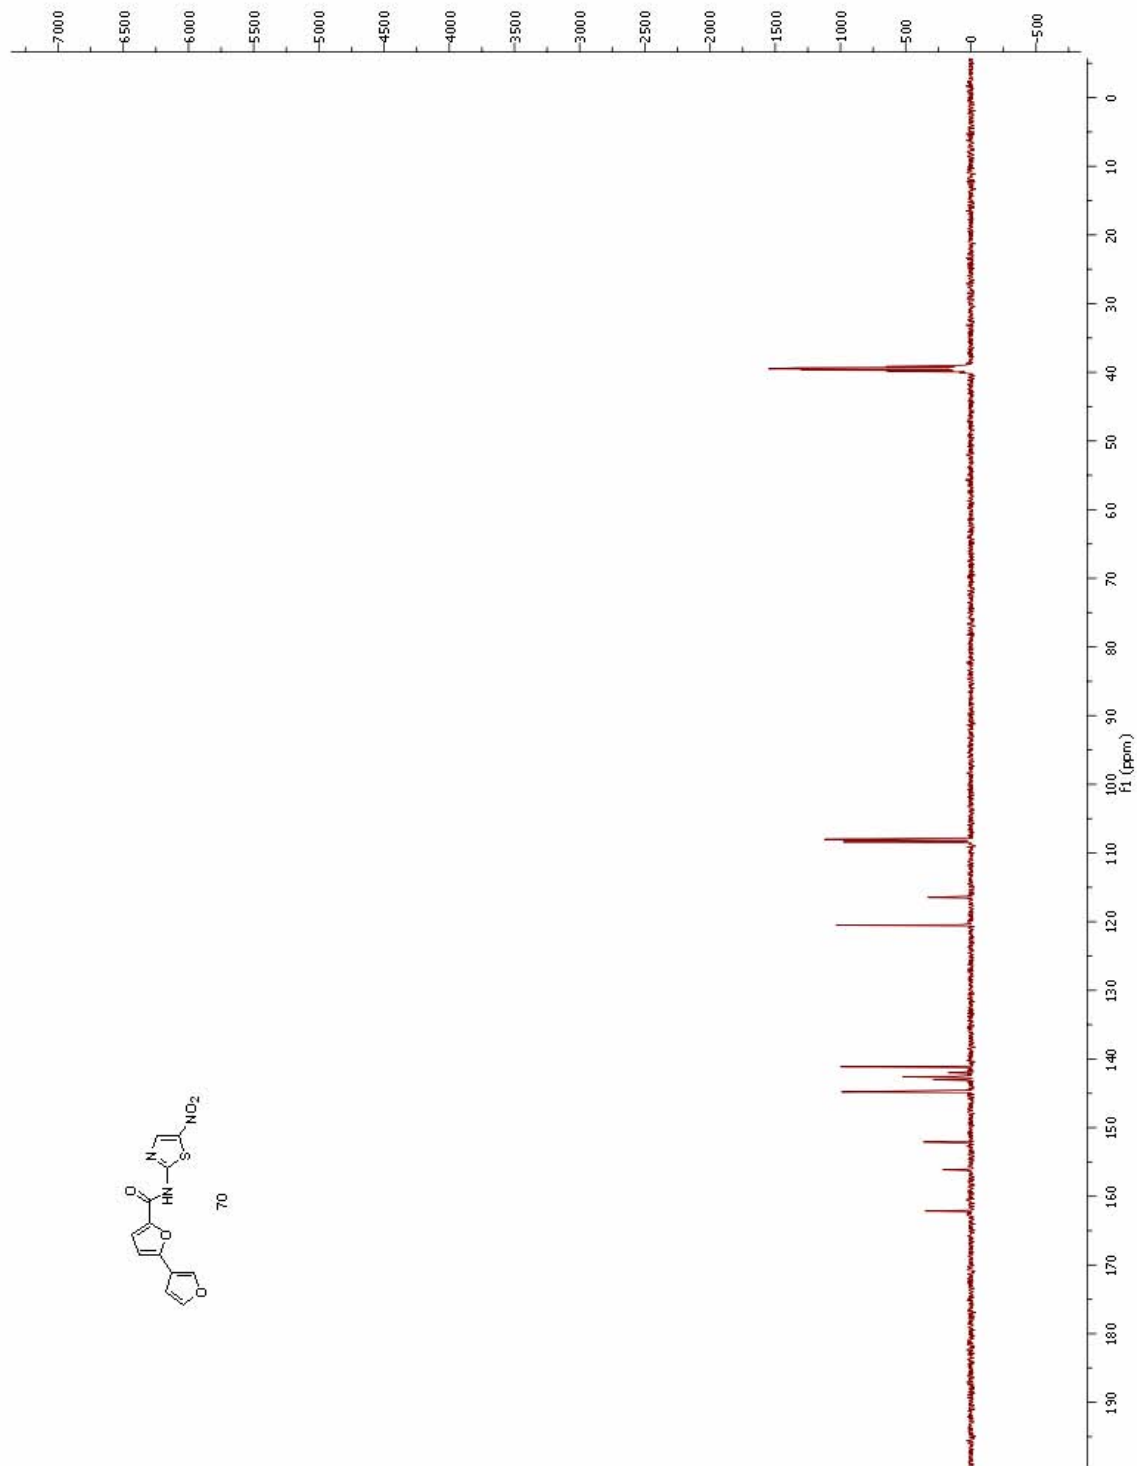



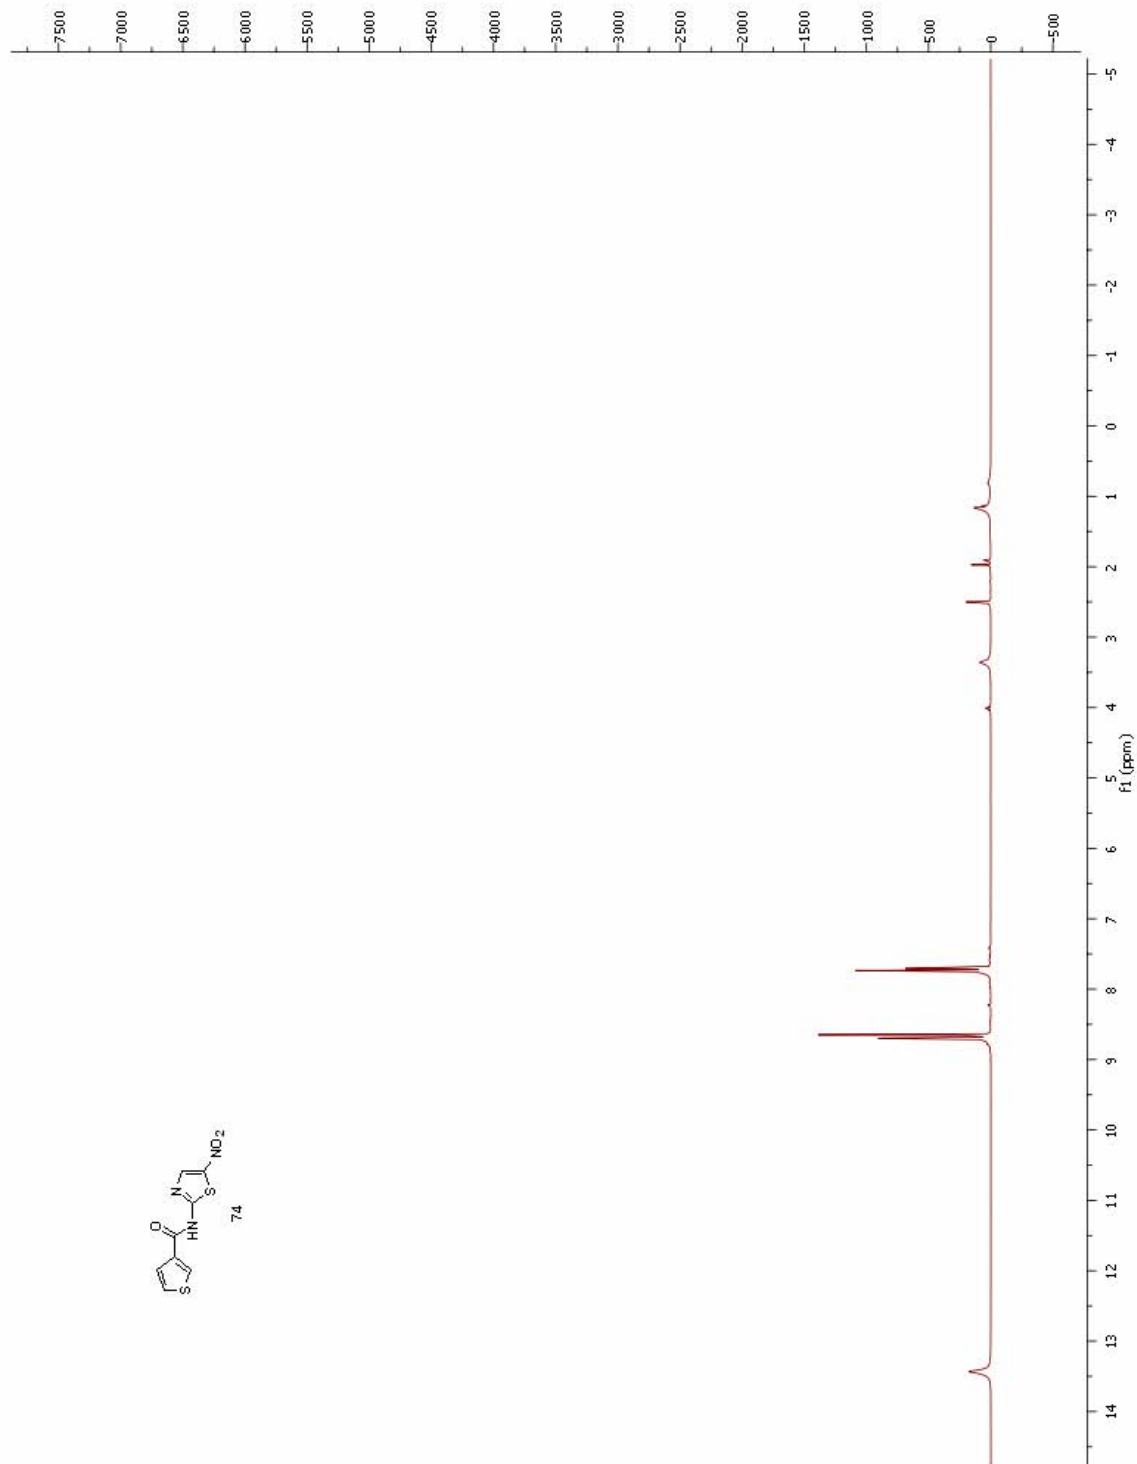

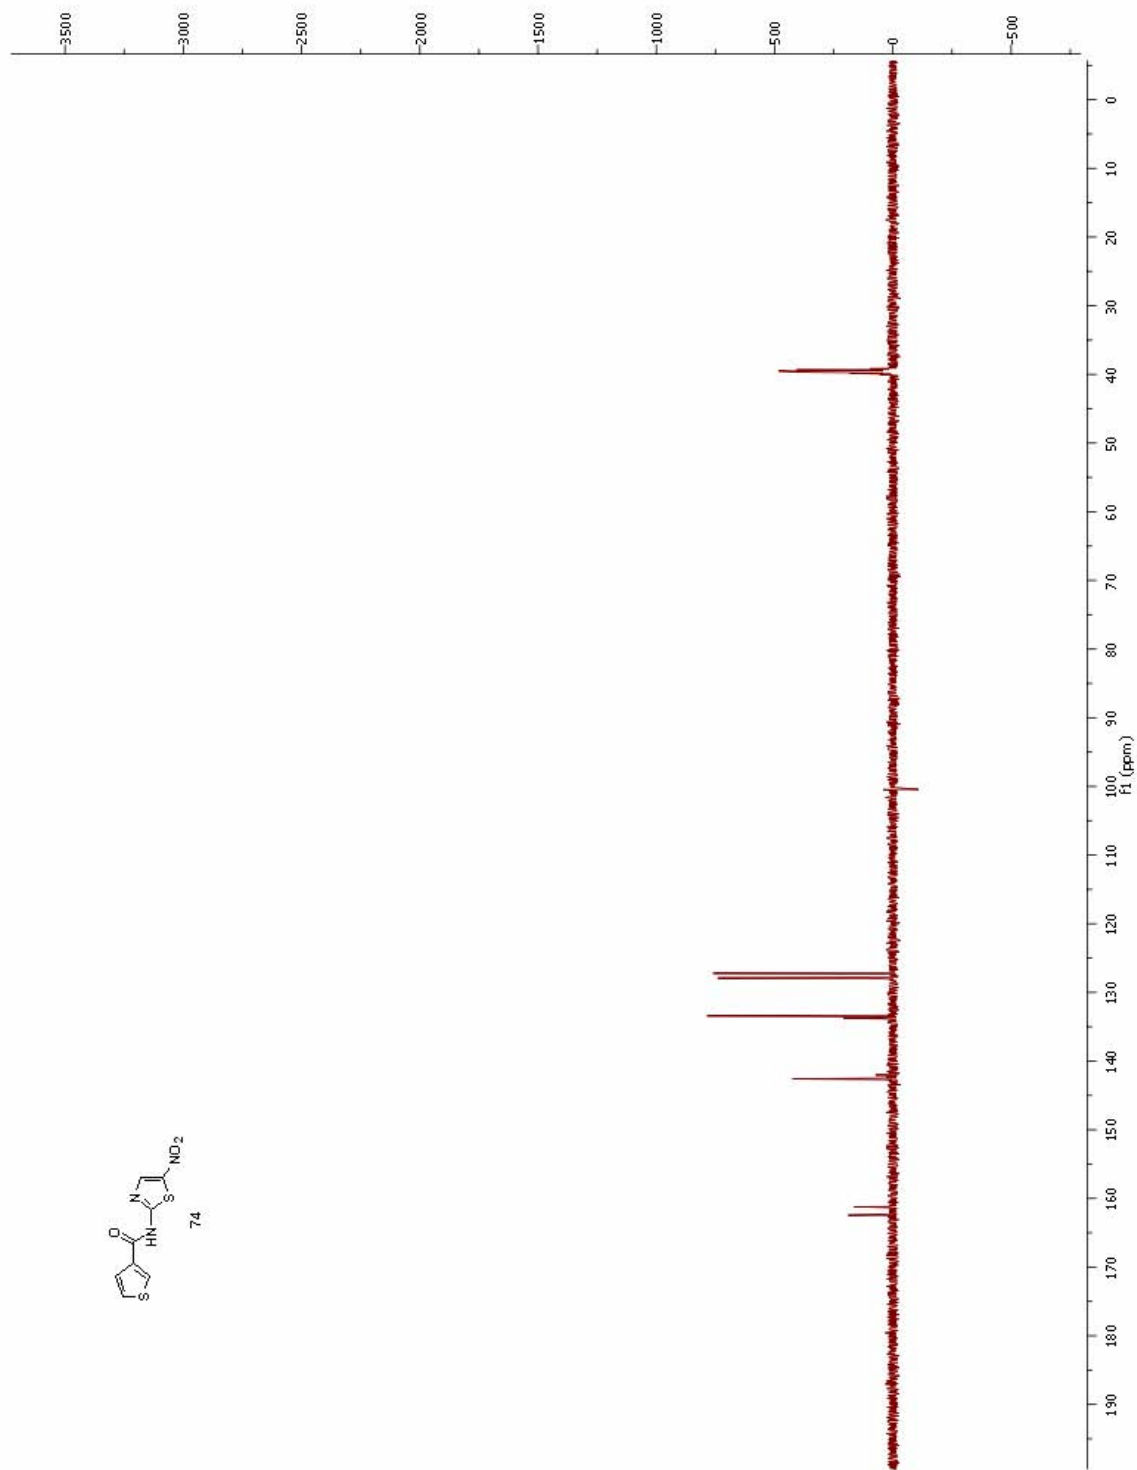

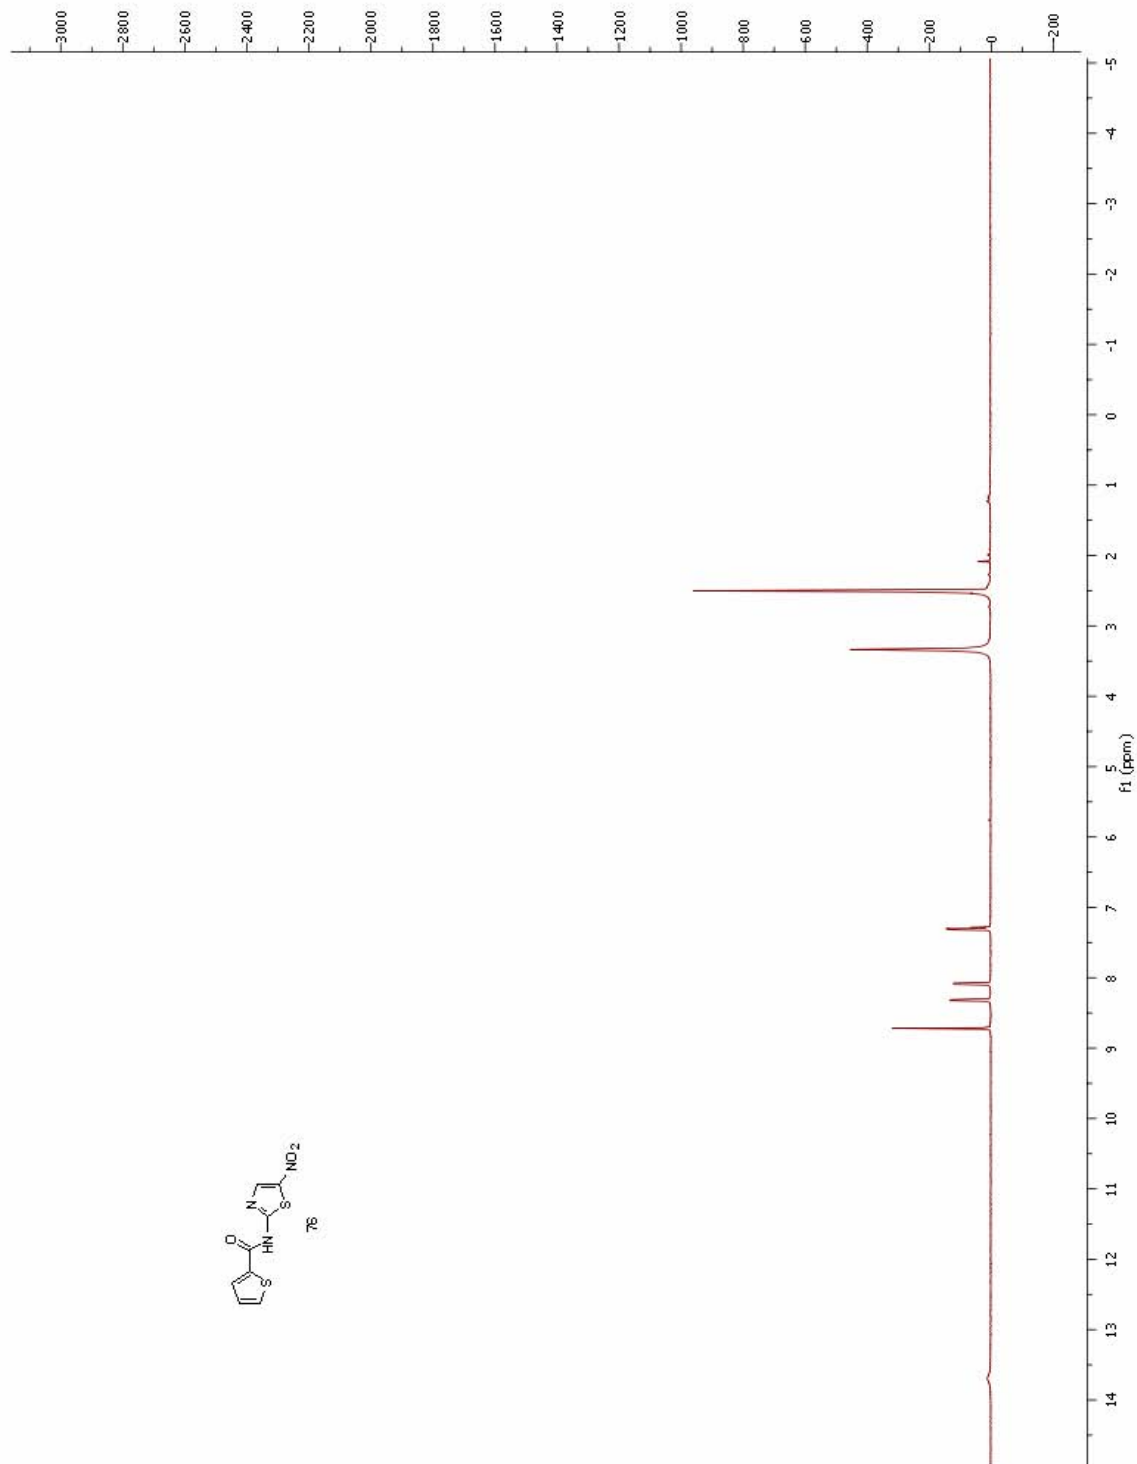

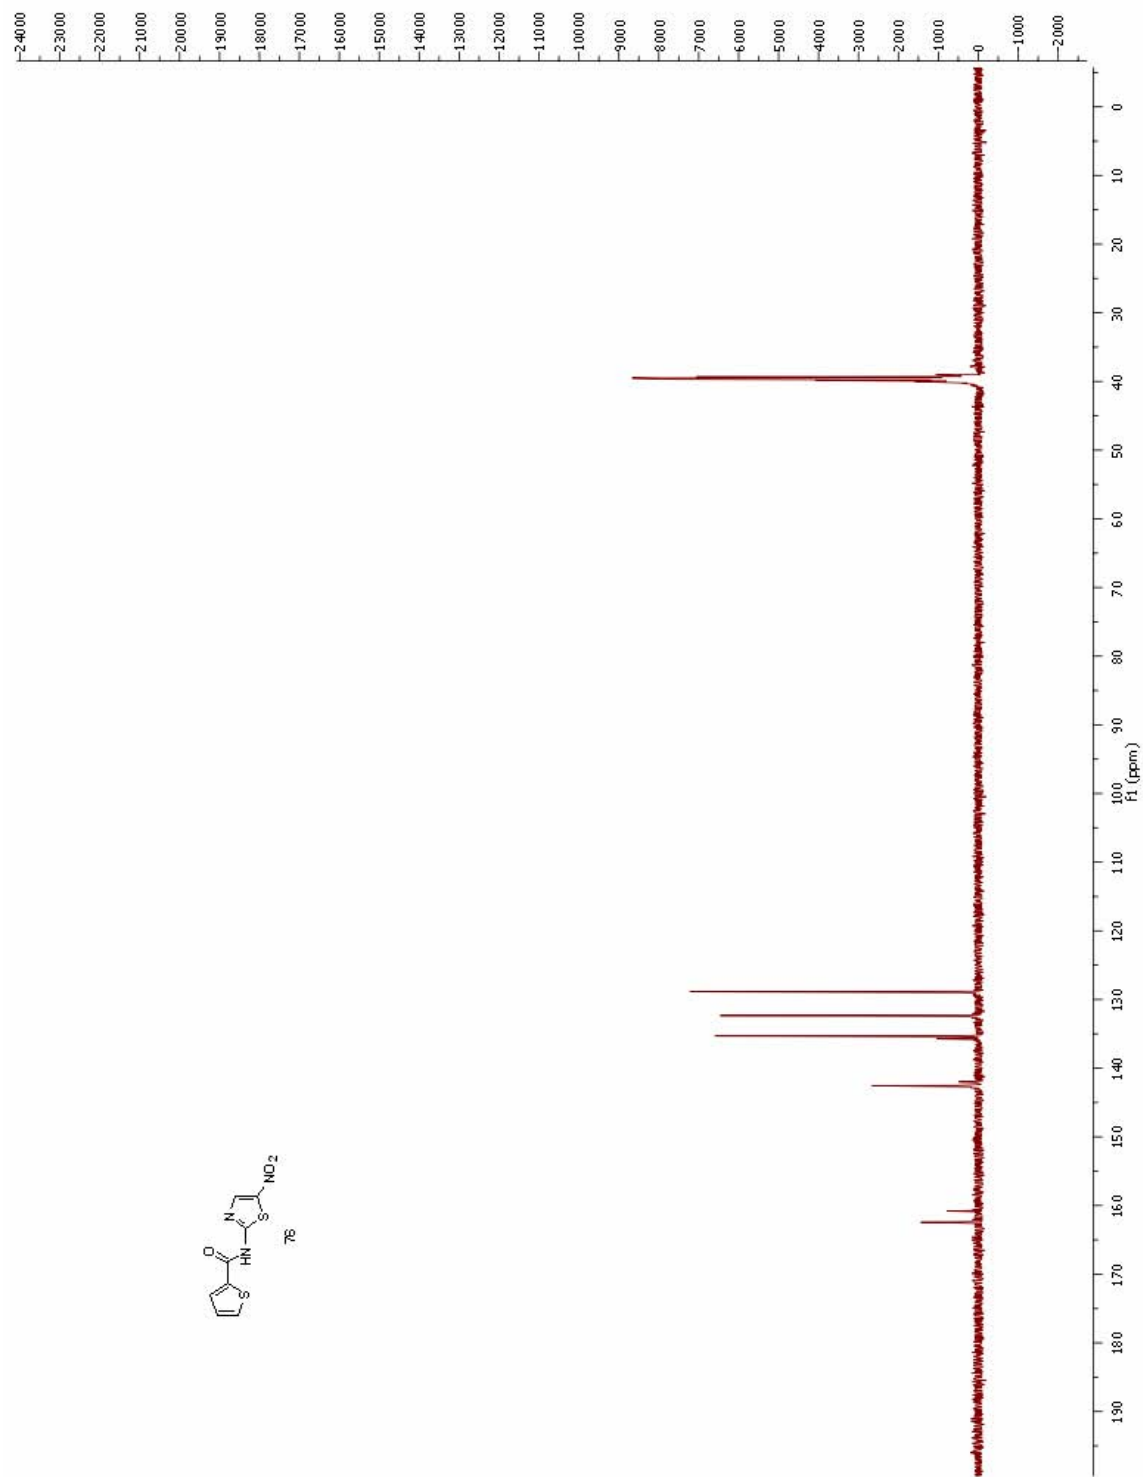

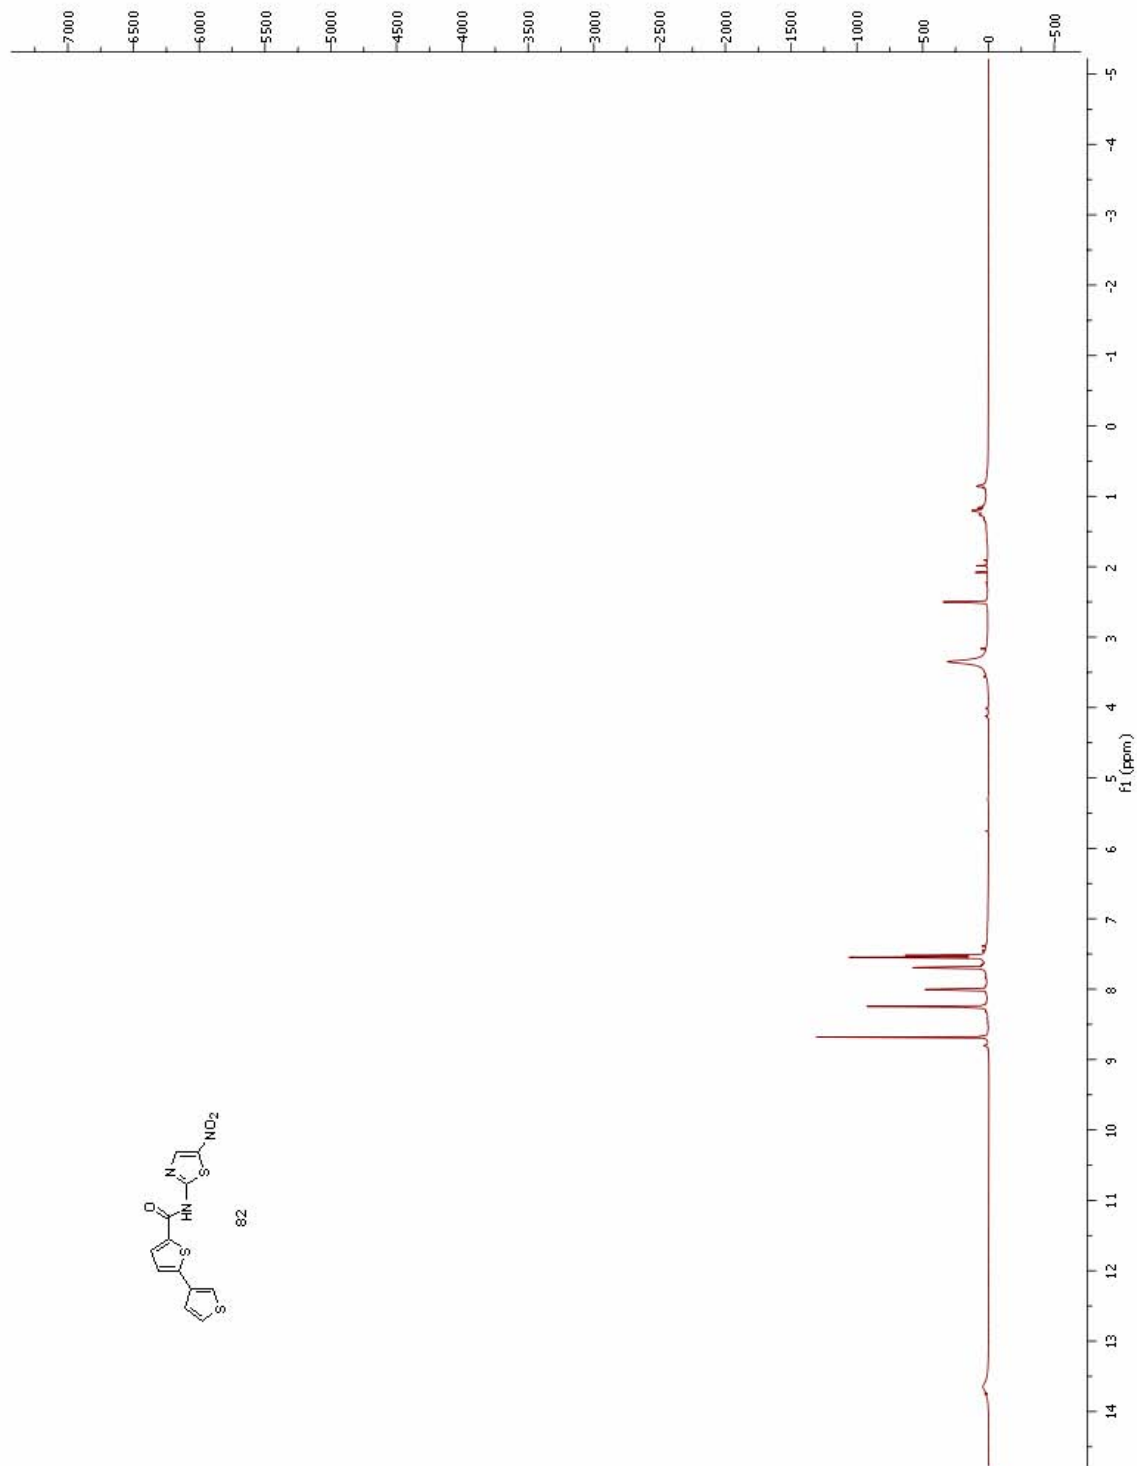

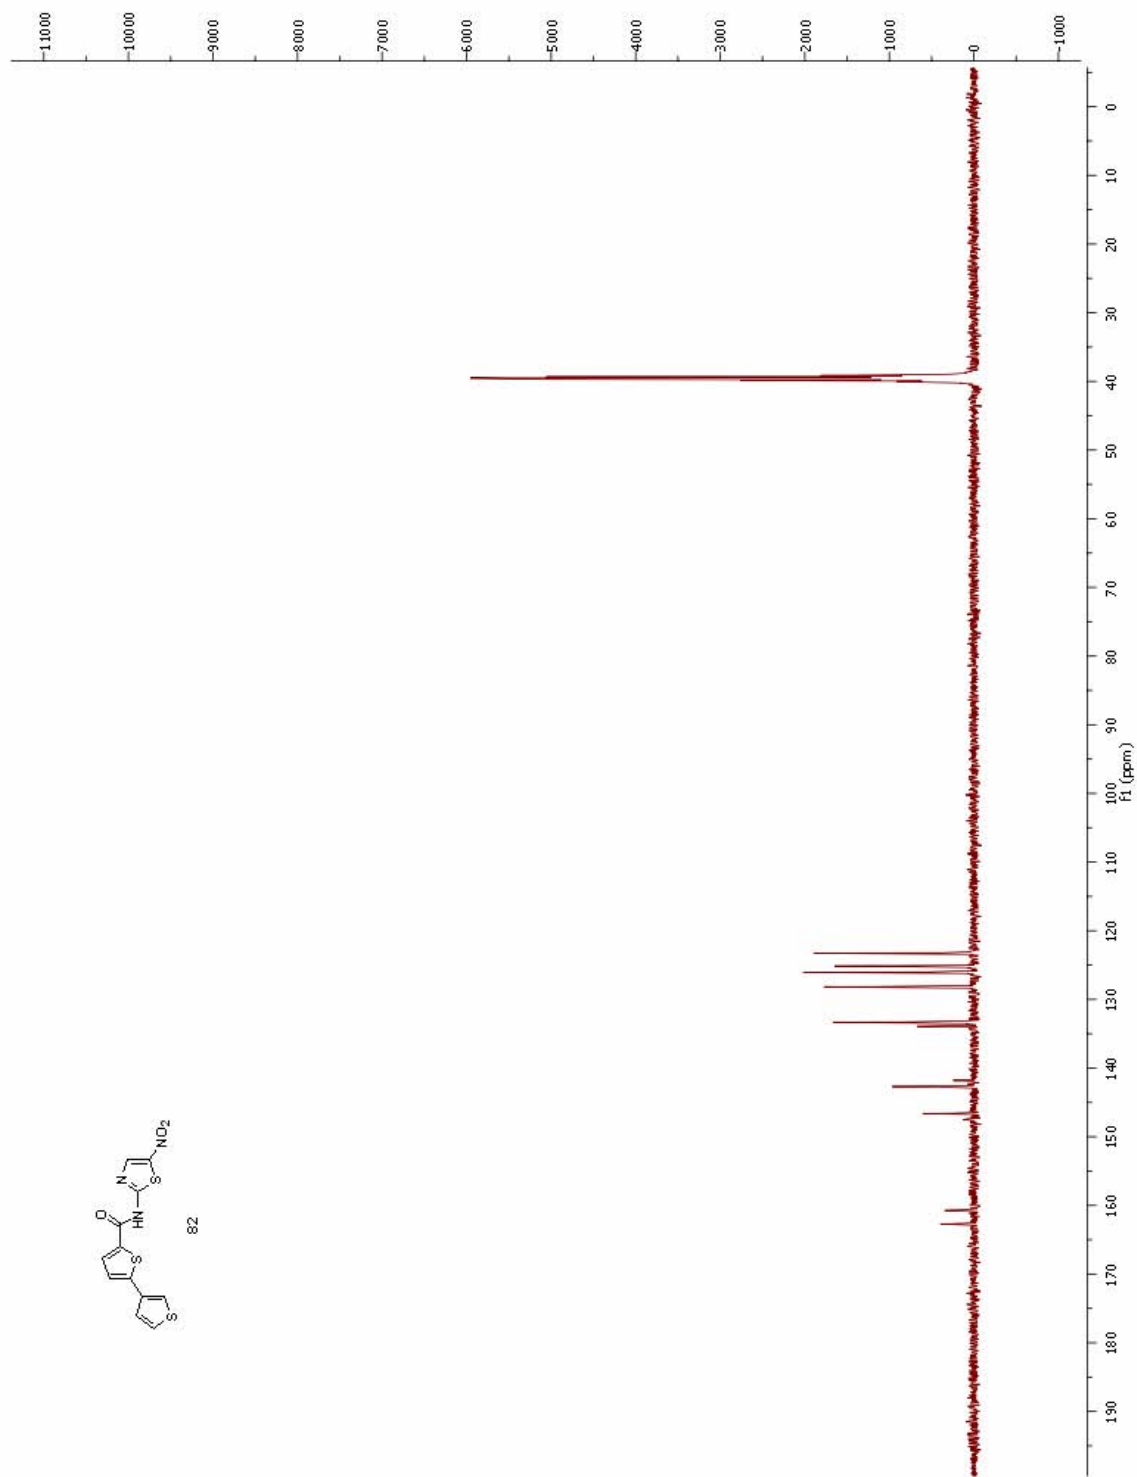

Supplement: NIHMS263549-supplement-Supporting_Information.pdf [file NIHMS263549-supplement-Supporting_Information.pdf]
